# Supplementary material
Source: publisher figshare collection journal article supplement (https://geolsoc.figshare.com/ndownloader/files/15326855)
Supplement: Supplementary file 1 [file 15326855]

## Sheet: Sheet1
heithts	genus	species(sub-species)	length（µm）	log (in length)
16.8	Hindeodus	parvus	657.143	2.81766
16.8	Hindeodus	parvus	266.667	2.42597
19.08	Hindeodus	parvus	232.911	2.36719
19.08	Hindeodus	parvus	250.633	2.39904
19.08	Hindeodus	praeparvus	377.215	2.57659
19.08	Hindeodus	praeparvus	334.177	2.52398
19.08	Hindeodus	praeparvus	356.962	2.55262
21.61	Hindeodus	parvus	479.452	2.68075
21.61	Hindeodus	sp.	445.205	2.64856
21.61	Hindeodus	praeparvus	438.356	2.64183
22.01	Hindeodus	parvus	420.253	2.62351
22.01	Hindeous	typicalis	313.924	2.49682
23.31	Hindeodus	parvus	479.452	2.68075
23.31	Hindeodus	anterodentatus	301.37	2.4791
23.31	Hindeodus	anterodentatus	431.507	2.63499
23.31	Hindeodus	bicuspidatus	308.219	2.48886
23.31	Hindeodus	bicuspidatus	397.26	2.59908
23.31	Hindeodus	bicuspidatus	623.288	2.79469
23.31	Hindeodus	eurypyge	417.808	2.62098
23.31	Hindeodus	parvus	698.63	2.84425
23.31	Hindeodus	parvus	541.096	2.73327
23.31	Hindeodus	parvus	212.329	2.32701
23.31	Hindeodus	parvus	410.959	2.6138
23.31	Hindeodus	parvus	390.411	2.59152
23.31	Hindeodus	parvus	452.055	2.65519
23.31	Hindeodus	parvus	534.247	2.72774
23.31	Hindeodus	parvus	472.603	2.6745
23.31	Hindeodus	parvus	342.466	2.53462
23.31	Hindeodus	parvus	280.822	2.44843
23.31	Hindeodus	parvus	390.411	2.59152
23.31	Hindeodus	parvus	363.014	2.55992
23.31	Hindeodus	parvus	369.863	2.56804
23.31	Hindeodus	parvus	335.616	2.52584
23.31	Hindeodus	parvus	335.616	2.52584
23.31	Hindeodus	parvus	356.164	2.55165
23.31	Hindeodus	parvus	294.521	2.46912
23.31	Hindeodus	parvus	417.808	2.62098
23.31	Hindeodus	parvus	335.616	2.52584
23.31	Hindeodus	parvus	315.068	2.4984
23.31	Hindeodus	parvus	301.37	2.4791
23.31	Hindeodus	parvus	342.466	2.53462
23.31	Hindeodus	parvus	301.37	2.4791
23.31	Hindeodus	parvus	280.822	2.44843
23.31	Hindeodus	parvus	212.329	2.32701
23.31	Hindeodus	parvus	363.014	2.55992
23.31	Hindeodus	parvus	260.274	2.41543
23.31	Hindeodus	parvus	315.068	2.4984
23.31	Hindeodus	parvus	321.918	2.50775
23.31	Hindeodus	parvus	431.507	2.63499
23.31	Hindeodus	parvus	458.904	2.66172
23.31	Hindeodus	parvus	349.315	2.54322
23.31	Hindeodus	parvus	369.863	2.56804
23.31	Hindeodus	parvus	479.452	2.68075
23.31	Hindeodus	parvus	301.37	2.4791
23.31	Hindeodus	parvus	335.616	2.52584
23.31	Hindeodus	parvus	287.671	2.4589
23.31	Hindeodus	parvus	308.219	2.48886
23.31	Hindeodus	parvus	273.973	2.43771
23.31	Hindeodus	parvus	513.699	2.71071
23.31	Hindeodus	parvus	424.658	2.62804
23.31	Hindeodus	parvus	424.658	2.62804
23.31	Hindeodus	praeparvus	369.863	2.56804
23.31	Hindeodus	praeparvus	321.918	2.50775
23.31	Hindeodus	praeparvus	335.616	2.52584
23.31	Hindeodus	praeparvus	328.767	2.51689
23.31	Hindeodus	praeparvus	575.342	2.75993
23.31	Hindeodus	praeparvus	273.973	2.43771
23.31	Hindeodus	praeparvus	356.164	2.55165
23.31	Hindeodus	praeparvus	397.26	2.59908
23.31	Hindeodus	praeparvus	561.644	2.74946
23.31	Hindeodus	sp.	452.055	2.65519
23.31	Hindeodus	sp.	356.164	2.55165
23.31	Hindeodus	sp.	438.356	2.64183
23.31	Hindeodus	sp.	630.137	2.79943
23.31	Hindeodus	sp.	328.767	2.51689
23.31	Hindeodus	sp.	335.616	2.52584
23.31	Hindeodus	sp.	301.37	2.4791
23.31	Hindeodus	sp.	328.767	2.51689
23.31	Hindeodus	sp.	369.863	2.56804
23.31	Hindeodus	typicalis	356.164	2.55165
23.31	Hindeodus	typicalis	280.822	2.44843
23.31	Hindeodus	typicalis	541.096	2.73327
23.31	Hindeodus	typicalis	438.356	2.64183
23.31	Hindeodus	typicalis	369.863	2.56804
23.31	Hindeodus	typicalis	301.37	2.4791
23.31	Hindeodus	typicalis	335.616	2.52584
23.31	Hindeodus	typicalis	280.822	2.44843
23.31	Isacicella	inflata	452.055	2.65519
23.31	Isacicella	inflata	636.986	2.80413
23.31	Isarcicella	inflata	561.644	2.74946
23.31	Isarcicella	inflata	493.151	2.69298
23.31	Isarcicella	lobata	424.658	2.62804
23.31	Isarcicella	lobata	630.137	2.79943
23.31	Isarcicella	lobata	438.356	2.64183
23.31	Isarcicella	lobata	458.904	2.66172
23.31	Isarcicella	lobata	506.849	2.70488
23.31	Isarcicella	lobata	527.397	2.72214
23.31	Isarcicella	lobata	390.411	2.59152
23.31	Isarcicella	lobata	575.342	2.75993
23.31	Isarcicella	lobata	397.26	2.59908
23.31	Isarcicella	sp.	342.466	2.53462
23.31	Isarcicella	sp.	520.548	2.71646
23.31	Isarcicella	turgida	280.822	2.44843
23.31	Isarcicella	turgida	335.616	2.52584
23.31	Isarcicella	turgida	390.411	2.59152
23.31	Isarcicella	turgida	397.26	2.59908
24.11	Hindeodus	preaparvus	287.671	2.4589
24.11	Hindeodus	anterodentatus	321.918	2.50775
24.11	Hindeodus	anterodentatus	376.712	2.57601
24.11	Hindeodus	bicupspidatus	452.055	2.65519
24.11	Hindeodus	bicuspidatus	294.521	2.46912
24.11	Hindeodus	bicuspidatus	520.548	2.71646
24.11	Hindeodus	eurypyge	308.219	2.48886
24.11	Hindeodus	eurypyge	458.904	2.66172
24.11	Hindeodus	eyrypyge	404.11	2.6065
24.11	Hindeodus	infata	541.096	2.73327
24.11	Hindeodus	inflatus	349.315	2.54322
24.11	Hindeodus	inflatus	308.219	2.48886
24.11	Hindeodus	latidentatus	342.466	2.53462
24.11	Hindeodus	parvus	294.521	2.46912
24.11	Hindeodus	parvus	328.767	2.51689
24.11	Hindeodus	parvus	342.466	2.53462
24.11	Hindeodus	parvus	383.562	2.58384
24.11	Hindeodus	parvus	253.425	2.40385
24.11	Hindeodus	parvus	321.918	2.50775
24.11	Hindeodus	parvus	280.822	2.44843
24.11	Hindeodus	parvus	383.562	2.58384
24.11	Hindeodus	parvus	369.863	2.56804
24.11	Hindeodus	parvus	260.274	2.41543
24.11	Hindeodus	parvus	458.904	2.66172
24.11	Hindeodus	parvus	273.973	2.43771
24.11	Hindeodus	parvus	321.918	2.50775
24.11	Hindeodus	parvus	465.753	2.66816
24.11	Hindeodus	parvus	273.973	2.43771
24.11	Hindeodus	parvus	294.521	2.46912
24.11	Hindeodus	parvus	328.767	2.51689
24.11	Hindeodus	parvus	294.521	2.46912
24.11	Hindeodus	parvus	246.575	2.39195
24.11	Hindeodus	parvus	294.521	2.46912
24.11	Hindeodus	parvus	280.822	2.44843
24.11	Hindeodus	parvus	383.562	2.58384
24.11	Hindeodus	parvus	342.466	2.53462
24.11	Hindeodus	parvus	328.767	2.51689
24.11	Hindeodus	parvus	294.521	2.46912
24.11	Hindeodus	parvus	356.164	2.55165
24.11	Hindeodus	parvus	486.301	2.68691
24.11	Hindeodus	parvus	568.493	2.75473
24.11	Hindeodus	parvus	253.425	2.40385
24.11	Hindeodus	parvus	308.219	2.48886
24.11	Hindeodus	parvus	287.671	2.4589
24.11	Hindeodus	parvus	609.589	2.78504
24.11	Hindeodus	parvus	294.521	2.46912
24.11	Hindeodus	parvus	397.26	2.59908
24.11	Hindeodus	parvus	328.767	2.51689
24.11	Hindeodus	parvus	493.151	2.69298
24.11	Hindeodus	parvus	486.301	2.68691
24.11	Hindeodus	parvus	376.712	2.57601
24.11	Hindeodus	parvus	335.616	2.52584
24.11	Hindeodus	parvus	321.918	2.50775
24.11	Hindeodus	parvus	301.37	2.4791
24.11	Hindeodus	parvus	321.918	2.50775
24.11	Hindeodus	parvus	273.973	2.43771
24.11	Hindeodus	parvus	253.425	2.40385
24.11	Hindeodus	parvus	239.726	2.37972
24.11	Hindeodus	parvus	260.274	2.41543
24.11	Hindeodus	parvus	472.603	2.6745
24.11	Hindeodus	parvus	335.616	2.52584
24.11	Hindeodus	parvus	315.068	2.4984
24.11	Hindeodus	peculiaris	465.753	2.66816
24.11	Hindeodus	praeparvus	280.822	2.44843
24.11	Hindeodus	praeparvus	212.329	2.32701
24.11	Hindeodus	praeparvus	226.027	2.35416
24.11	Hindeodus	praeparvus	253.425	2.40385
24.11	Hindeodus	praeparvus	287.671	2.4589
24.11	Hindeodus	praeparvus	287.671	2.4589
24.11	Hindeodus	praeparvus	267.123	2.42671
24.11	Hindeodus	sp	383.562	2.58384
24.11	Hindeodus	sp.	328.767	2.51689
24.11	Hindeodus	sp.	554.795	2.74413
24.11	Hindeodus	sp.	417.808	2.62098
24.11	Hindeodus	sp.	260.274	2.41543
24.11	Hindeodus	sp.	212.329	2.32701
24.11	Hindeodus	sp.	417.808	2.62098
24.11	Hindeodus	sp.	280.822	2.44843
24.11	Hindeodus	sp.	226.027	2.35416
24.11	Hindeodus	sp.	520.548	2.71646
24.11	Hindeodus	sp.	445.205	2.64856
24.11	Hindeodus	sp.	253.425	2.40385
24.11	Hindeodus	sp.	335.616	2.52584
24.11	Hindeodus	sp.	376.712	2.57601
24.11	Hindeodus	sp.	342.466	2.53462
24.11	Hindeodus	sp.	335.616	2.52584
24.11	Hindeodus	sp.	445.205	2.64856
24.11	Hindeodus	sp.	424.658	2.62804
24.11	Hindeodus	sp.	294.521	2.46912
24.11	Hindeodus	sp.	486.301	2.68691
24.11	Hindeodus	typicalis	335.616	2.52584
24.11	Hindeodus	typicalis	212.329	2.32701
24.11	Hindeodus	typicalis	260.274	2.41543
24.11	Hindeodus	typicalis	315.068	2.4984
24.11	Hindeodus	typicalis	260.274	2.41543
24.11	Hindeodus	typicalis	349.315	2.54322
24.11	Hindeodus	typicalis	321.918	2.50775
24.11	Hindeodus	typicalis	383.562	2.58384
24.11	Hindeodus	typicalis	410.959	2.6138
24.11	Hindeodus	typicalis	315.068	2.4984
24.11	Hindeodus	typicalis	431.507	2.63499
24.11	Hindeodus	typicalis	308.219	2.48886
24.11	Hindeodus	typicalis	287.671	2.4589
24.11	Hindeodus	typicalis	335.616	2.52584
24.11	Hindeodus	typicalis	280.822	2.44843
24.11	Hindeodus	typicalis	534.247	2.72774
24.11	Hindeodus	typicalis	541.096	2.73327
24.11	Hindeodus	typicalis	363.014	2.55992
24.11	Hindeodus	typicalis	506.849	2.70488
24.11	Hindeodus	typicalis	321.918	2.50775
24.11	Hindeodus	typicalis	287.671	2.4589
24.11	Hindeodus .	typicalis	321.918	2.50775
24.11	Hndeodus	typicalis	369.863	2.56804
24.11	Isarcicella	staechei	301.37	2.4791
24.11	Isarcicella	staechei	328.767	2.51689
24.11	Isarcicella	inflata	287.671	2.4589
24.11	Isarcicella	inflata	513.699	2.71071
24.11	Isarcicella	isarcica	630.137	2.79943
24.11	Isarcicella	lobata	582.192	2.76507
24.11	Isarcicella	lobata	273.973	2.43771
24.11	Isarcicella	lobata	260.274	2.41543
24.11	Isarcicella	lobata	493.151	2.69298
24.11	Isarcicella	lobata	390.411	2.59152
24.11	Isarcicella	lobata	356.164	2.55165
24.11	Isarcicella	lobata	424.658	2.62804
24.11	Isarcicella	lobata	691.781	2.83997
24.11	Isarcicella	staechei	554.795	2.74413
24.11	Isarcicella	staechei	506.849	2.70488
24.11	Isarcicella	staechei	801.37	2.90383
24.11	Isarcicella	staechei	445.205	2.64856
24.11	Isarcicella	staechei	479.452	2.68075
24.11	Isarcicella	staechei	219.178	2.3408
24.11	Isarcicella	staechei	301.37	2.4791
24.11	Isarcicella	staechei	390.411	2.59152
24.11	Isarcicella	staechei	301.37	2.4791
24.11	Isarcicella	staechei	294.521	2.46912
24.11	Isarcicella	staechei	328.767	2.51689
24.11	Isarcicella	staechei	705.479	2.84848
25.39	Hindeodus	anterodentatus	438.356	2.64183
25.39	Hindeodus	parvus	278.788	2.44527
25.39	Hindeodus	parvus	406.849	2.60943
25.39	Hindeodus	parvus	417.722	2.62089
25.39	Hindeodus	postparvus	375.949	2.57513
25.39	Hindeodus	postparvus	400	2.60206
25.39	Hindeodus	postparvus	354.43	2.54953
25.39	Hindeodus	postparvus	481.013	2.68216
25.39	Hindeodus	postparvus	351.899	2.54642
25.39	Hindeodus	postparvus	440.506	2.64395
25.39	Hindeodus	postparvus	436.709	2.64019
25.39	Hindeodus	postparvus	372.152	2.57072
25.39	Hindeodus	praeparvus	445.57	2.64892
25.39	Hindeodus	sp.	245.283	2.38967
25.39	Hindeodus	typicalis	276.712	2.44203
25.39	Hindeodus	typicalis	298.734	2.47528
25.39	Hindeodus	typicalis	232.075	2.36563
25.39	Hindeodus	praeparvus	293.151	2.46709
25.39	Hindeodus	typicalis	373.973	2.57284
26.49	Hindeodus	bicuspidatus	376.712	2.57601
26.49	Hindeodus	bicuspidatus	356.164	2.55165
26.49	Hindeodus	bicuspidatus	356.164	2.55165
26.49	Hindeodus	latidentatus	328.767	2.51689
26.49	Hindeodus	parvus	178.082	2.25062
26.49	Hindeodus	postparvus	294.521	2.46912
26.49	Hindeodus	praeparvus	301.37	2.4791
26.49	Hindeodus	praeparvus	301.37	2.4791
26.49	Hindeodus	praeparvus	253.425	2.40385
26.49	Hindeodus	sp.	321.918	2.50775
26.49	Hindeodus	sp.	328.767	2.51689
26.49	Hindeodus	sp.	239.726	2.37972
26.49	Hindeodus	sp.	301.37	2.4791
26.49	Hindeodus	typicalis	397.26	2.59908
26.49	Hindeodus	typicalis	500	2.69897
26.49	Hindeodus	typicalis	301.37	2.4791
27.34	Hindeodus	postparvus	264.151	2.42185
27.34	Hindeodus	postparvus	316.456	2.50031
27.34	Hindeodus	postparvus	351.515	2.54594
27.34	Hindeodus	postparvus	336.709	2.52725
27.34	Hindeodus	postparvus	258.491	2.41244
27.34	Hindeodus	postparvus	294.521	2.46912
27.34	Hindeodus	postparvus	267.123	2.42671
27.34	Hindeodus	postparvus	280.822	2.44843
27.34	Hindeodus	postparvus	301.37	2.4791
27.34	Hindeodus	postparvus	363.014	2.55992
27.34	Hindeodus	sosioensis	212.329	2.32701
27.34	Hindeodus	sp.	345.455	2.53839
27.54	Hindeodus	typicalis	281.132	2.44891
27.54	Hindeodus	typicalis	295.556	2.47064
27.54	Hindeodus	peculiaris	326.027	2.51325
27.54	Hindeodus	sp.	412.658	2.61559
27.54	Hindeodus	postparvus	321.519	2.50721
27.54	Hindeodus	sp.	292.453	2.46606
27.54	Hindeodus	postparvus	364.557	2.56177
27.54	Hindeodus	postparvus	271.698	2.43409
27.54	Hindeodus	postparvus	326.027	2.51325
27.54	Hindeodus	postparvus	351.899	2.54642
27.54	Hindeodus	postparvus	230.189	2.36208
27.54	Hindeodus	postparvus	255.696	2.40772
27.54	Hindeodus	postparvus	288.608	2.46031
27.54	Hindeodus	postparvus	255.696	2.40772
27.54	Hindeodus	postparvus	265.823	2.42459
27.54	Hindeodus	postparvus	316.456	2.50031
27.54	Hindeodus	postparvus	239.726	2.37972
27.54	Hindeodus	postparvus	280.822	2.44843
27.54	Hindeodus	postparvus	253.425	2.40385
27.54	Hindeodus	postparvus	260.274	2.41543
28.99	Hindeodus	sosioensis	361.644	2.55828
28.99	Hindeodus	postparvus	389.041	2.59
28.99	Hindeodus	postparvus	389.041	2.59
28.99	Hindeodus	postparvus	362.025	2.55874
28.99	Hindeodus	postparvus	275.949	2.44083
28.99	Hindeodus	sosioensis	334.177	2.52398
28.99	Hindeodus	postparvus	306.329	2.48619
28.99	Hindeodus	postparvus	316.456	2.50031
28.99	Hindeodus	postparvus	328.767	2.51689
28.99	Hindeodus	postparvus	287.671	2.4589
28.99	Hindeodus	postparvus	335.616	2.52584
28.99	Hindeodus	postparvus	328.767	2.51689
28.99	Hindeodus	socioensis	308.219	2.48886
28.99	Hindeodus	sp.	301.37	2.4791
28.99	Hindeodus	sp.	342.466	2.53462
29.39	Hindeodus	postparvus	239.726	2.37972
29.39	Hindeodus	postparvus	321.918	2.50775
29.39	Hindeodus	postparvus	260.274	2.41543
29.39	Hindeodus	postparvus	294.521	2.46912
29.39	Hindeodus	sp.	321.918	2.50775
29.39	Hindeodus	postparvus	404.11	2.6065
29.39	Hindeodus	postparvus	335.616	2.52584
29.39	Hindeodus	postparvus	465.753	2.66816
29.39	Hindeodus	postparvus	205.479	2.31277
29.39	Hindeodus	sp.	232.877	2.36713
29.39	Hindeodus	postparvus	424.658	2.62804
29.69	Hindeodus	postparvus	465.753	2.66816
29.69	Hindeodus	?	280.822	2.44843
29.69	Hindeodus	postparvus	328.767	2.51689
29.69	Hindeodus	postparvus	301.37	2.4791
29.69	Hindeodus	sp.	273.973	2.43771
29.69	Hindeodus	postparvus	321.918	2.50775
29.69	Hindeodus	postparvus	369.863	2.56804
29.69	Hindeodus	bicuspidatus	589.041	2.77015
29.69	Hindeodus	sp.	232.877	2.36713
29.69	Hindeodus	postparvus	527.397	2.72214
29.69	Hindeodus	sp.	280.822	2.44843
29.69	Hindeodus	sp.	198.63	2.29805
29.69	Hindeodus	bicuspidata	383.562	2.58384
29.69	Hindeodus	postparvus	363.014	2.55992
29.69	Hindeodus	postparvus	465.753	2.66816
29.69	Hindeodus	postparvus	335.616	2.52584
29.69	Hindeodus	postparvus	321.918	2.50775
29.69	Hindeodus	postparvus	308.219	2.48886
29.69	Hindeodus	sp.	239.726	2.37972
29.69	Hindeodus	postparvus	363.014	2.55992
29.69	Hindeodus	postparvus	390.411	2.59152
29.69	Hindeodus	sp.	383.562	2.58384
29.69	Hindeodus	postparvus	424.658	2.62804
29.69	Hindeodus	bicuspidatus	383.562	2.58384
29.69	Hindeodus	anterodentatus	417.808	2.62098
29.69	Hindeodus	postparvus	349.315	2.54322
29.69	Hindeodus	postparvus	369.863	2.56804
29.69	Hindeodus	postparvus	390.411	2.59152
29.69	Hindeodus	postparvus	369.863	2.56804
29.69	Hindeodus	sp.	363.014	2.55992
29.69	Clarkina	kazi	732.877	2.86503
29.69	Clarkina	kazi	609.589	2.78504
29.69	Clarkina	carinata	684.932	2.83565
29.69	Clarkina	carinata	602.74	2.78013
29.79	Hindeodus	sp.	267.123	2.42671
29.79	Hindeodus	postparvus	369.863	2.56804
29.79	Hindeodus	postparvus	479.452	2.68075
29.79	Hindeodus	sosioensis	534.247	2.72774
29.79	Hindeodus	sosioensis	212.329	2.32701
29.79	Hindeodus	postparvus	452.055	2.65519
29.79	Hindeodus	postparvus	308.219	2.48886
29.79	Hindeodus	sp.	219.178	2.3408
29.79	Hindeodus	postparvus	342.466	2.53462
29.79	Hindeodus	postparvus	390.411	2.59152
29.79	Hindeodus	postparvus	342.466	2.53462
29.79	Hindeodus	postparvus	383.562	2.58384
29.79	Hindeodus	postparvus	308.219	2.48886
29.79	Hindeodus	postparvus	486.301	2.68691
29.79	Hindeodus	postparvus	390.411	2.59152
29.79	Hindeodus	postparvus	198.63	2.29805
29.79	Hindeodus	postparvus	308.219	2.48886
29.79	Hindeodus	postparvus	253.425	2.40385
29.79	Hindeodus	sp.	301.37	2.4791
29.79	Hindeodus	sosioensis	383.562	2.58384
29.79	Hindeodus	postparvus	267.123	2.42671
29.79	Hindeodus	postparvus	267.123	2.42671
29.79	Hindeodus	postparvus	321.918	2.50775
29.79	Hindeodus	postparvus	397.26	2.59908
29.79	Hindeodus	sp.	260.274	2.41543
29.79	Hindeodus	postparvus	349.315	2.54322
29.79	Hindeodus	postparvus	308.219	2.48886
29.79	Hindeodus	postparvus	410.959	2.6138
29.79	Hindeodus	postparvus	363.014	2.55992
29.79	Hindeodus	postparvus	260.274	2.41543
29.79	Hindeodus	postparvus	294.521	2.46912
29.79	Hindeodus	postparvus	315.068	2.4984
29.79	Hindeodus	postparvus	404.11	2.6065
29.79	Hindeodus	postparvus	328.767	2.51689
29.79	Hindeodus	postparvus	294.521	2.46912
29.79	Hindeodus	postparvus	321.918	2.50775
29.79	Hindeodus	postparvus	315.068	2.4984
29.79	Hindeodus	postparvus	369.863	2.56804
29.79	Hindeodus	postparvus	301.37	2.4791
29.79	Hindeodus	sosioensis	417.808	2.62098
29.79	Hindeodus	postparvus	301.37	2.4791
29.79	Hindeodus	postparvus	226.027	2.35416
29.79	Hindeodus	sosioensis	328.767	2.51689
29.79	Hindeodus	postparvus	246.575	2.39195
29.79	Hindeodus	sosioensis	410.959	2.6138
29.79	Hindeodus	postparvus	232.877	2.36713
29.79	Hindeodus	postparvus	315.068	2.4984
29.79	Hindeodus	postparvus	363.014	2.55992
29.79	Hindeodus	sosioensis	383.562	2.58384
29.79	Hindeodus	postparvus	226.027	2.35416
29.79	Hindeodus	postparvus	164.384	2.21586
29.79	Hindeodus	postparvus	232.877	2.36713
29.79	Hindeodus	postparvus	321.918	2.50775
29.79	Hindeodus	sosioensis	363.014	2.55992
29.79	Hindeodus	postparvus	397.26	2.59908
29.79	Hindeodus	postparvus	260.274	2.41543
29.79	Hindeodus	sp.	349.315	2.54322
29.79	Hindeodus	sp.	315.068	2.4984
29.79	Hindeodus	postparvus	253.425	2.40385
29.79	Hindeodus	sosioensis	424.658	2.62804
29.79	Hindeodus	sp.	431.507	2.63499
29.79	Hindeodus	postparvus	246.575	2.39195
29.79	Hindeodus	postparvus	260.274	2.41543
29.79	Hindeodus	postparvus	239.726	2.37972
29.79	Hindeodus	postparvus	294.521	2.46912
29.79	Hindeodus	postparvus	273.973	2.43771
29.79	Hindeodus	postparvus	280.822	2.44843
29.79	Hindeodus	postparvus	376.712	2.57601
29.79	Hindeodus	postparvus	301.37	2.4791
29.79	Hindeodus	postparvus	383.562	2.58384
30.29	Clarkina	krystyni	531.646	2.72562
30.29	Clarkina	krystyni	450.633	2.65382
30.29	Clarkina	kazi	581.818	2.76479
30.29	Clarkina	planata	512.658	2.70983
30.29	Clarkina	planata	436.364	2.63985
30.29	Clarkina	lehrmanni	592.405	2.77262
30.29	Clarkina	lehrmanni	496.97	2.69633
30.29	Clarkina	krystyni	618.987	2.79168
30.29	Clarkina	lehrmanni	545.455	2.73676
30.29	Clarkina	krystyni	653.165	2.81502
30.29	Clarkina	lehrmanni	558.228	2.74681
30.29	Clarkina	lehrmanni	634.177	2.80221
30.29	Clarkina	taylorae	603.797	2.78089
30.29	Clarkina	lehrmanni	560.606	2.74866
30.29	Clarkina	lehrmanni	637.975	2.8048
30.29	Clarkina	lehrmanni	557.576	2.7463
30.29	Clarkina	krystyni	648.101	2.81164
30.29	Clarkina	lehrmanni	548.485	2.73916
30.29	Clarkina	krystyni	754.43	2.87762
30.29	Clarkina	krystyni	397.468	2.5993
30.29	Clarkina	krystyni	562.025	2.74976
30.29	Clarkina	krystyni	619.048	2.79172
30.29	Clarkina	krystyni	638.095	2.80489
30.29	Clarkina	krystyni	421.519	2.62482
30.29	Clarkina	lehrmanni	562.025	2.74976
30.29	Clarkina	planata	535.443	2.72871
30.29	Clarkina	kazi	508.861	2.7066
30.29	Clarkina	lehrmanni	508.861	2.7066
30.29	Clarkina	lehrmanni	886.364	2.94761
30.29	Clarkina	krystyni	520.253	2.71621
30.29	Clarkina	lehrmanni	497.468	2.69677
31.84	Hindeodus	postparvus	363.014	2.55992
31.84	Hindeodus	socioensis	301.37	2.4791
31.84	Hindeodus	postparvus	273.973	2.43771
31.84	Hindeodus	postparvus	287.671	2.4589
31.84	Hindeodus	postparvus	246.575	2.39195
31.84	Hindeodus	postparvus	335.616	2.52584
31.84	Hindeodus	sosioensis	267.123	2.42671
31.84	Hindeodus	sosioensis	376.712	2.57601
31.84	Hindeodus	sosioensis	349.315	2.54322
31.84	Hindeodus	postparvus	376.712	2.57601
31.84	Hindeodus	sp.	198.63	2.29805
31.84	Hindeodus	postparvus	280.822	2.44843
31.84	Hindeodus	postparvus	431.507	2.63499
31.84	Hindeodus	sosioensis	226.027	2.35416
31.84	Hindeodus	sosioensis	239.726	2.37972
31.84	Hindeodus	sp.	267.123	2.42671
31.84	Hindeodus	sosioensis	417.808	2.62098
31.84	Hindeodus	sp.	260.274	2.41543
31.84	Hindeodus	sosioensis	349.315	2.54322
31.84	Hindeodus	postparvus	363.014	2.55992
31.84	Hindeodus	postparvus	239.726	2.37972
31.84	Hindeodus	postparvus	315.068	2.4984
31.84	Hindeodus	sosioensis	397.26	2.59908
31.84	Hindeodus	sosioensis	328.767	2.51689
31.84	Hindeodus	postparvus	308.219	2.48886
31.84	Hindeodus	sp.	315.068	2.4984
31.84	Hindeodus	sosioensis	349.315	2.54322
31.84	Hindeodus	sp.	294.521	2.46912
31.84	Hindeodus	sosioensis	321.918	2.50775
31.84	Hindeodus	sosioensis	506.849	2.70488
31.84	Hindeodus	sosioensis	363.014	2.55992
31.84	Hindeodus	sosioensis	349.315	2.54322
31.84	Hindeodus	sosioensis	301.37	2.4791
31.84	Hindeodus	sosioensis	445.205	2.64856
31.84	Hindeodus	sp.	273.973	2.43771
31.84	Hindeodus	postparvus	410.959	2.6138
31.84	Hindeodus	sosioensis	315.068	2.4984
31.84	Hindeodus	postparvus	424.658	2.62804
31.84	Hindeodus	sp.	369.863	2.56804
31.84	Hindeodus	postparvus	356.164	2.55165
31.84	Hindeodus	postparvus	260.274	2.41543
31.84	Hindeodus	postparvus	410.959	2.6138
31.84	Hindeodus	sosioensis	226.027	2.35416
31.84	Hindeodus	postparvus	280.822	2.44843
31.84	Hindeodus	sosioensis	301.37	2.4791
31.84	Hindeodus	postparvus	232.877	2.36713
31.84	Hindeodus	sosioensis	328.767	2.51689
31.84	Hindeodus	postparvus	321.918	2.50775
31.84	Hindeodus	postparvus	397.26	2.59908
31.84	Hindeodus	postparvus	253.425	2.40385
31.84	Hindeodus	postparvus	328.767	2.51689
31.84	Hindeodus	sosioensis	404.11	2.6065
31.84	Hindeodus	sosioensis	253.425	2.40385
31.84	Hindeodus	sosioensis	260.274	2.41543
31.84	Hindeodus	sosioensis	342.466	2.53462
31.84	Hindeodus	sosioensis	431.507	2.63499
31.84	Hindeodus	postparvus	465.753	2.66816
31.84	Hindeodus	sosioensis	397.26	2.59908
31.84	Hindeodus	postparvus	232.877	2.36713
31.84	Hindeodus	sosioensis	410.959	2.6138
31.84	Hindeodus	sp.	349.315	2.54322
32.94	Hindeodus	sosioensis	273.973	2.43771
32.94	Hindeodus	sosioensis	267.123	2.42671
32.79	Clarkina	taylorae	376.712	2.57601
32.79	Clarkina	kazi	349.315	2.54322
32.79	Clarkina	kazi	363.014	2.55992
32.79	Neospathodus	sp.	349.315	2.54322
32.79	Neospathodus	sp.	321.918	2.50775
32.79	Neospathodus	sp.	417.808	2.62098
35.94	Neospathodus	dieneri 1	438.356	2.64183
35.94	Neospathodus	sp.	410.959	2.6138
35.94	Neospathodus	dieneri 1	273.973	2.43771
35.94	Neospathodus	dieneri 3	315.068	2.4984
35.94	Neospathodus	sp.	335.616	2.52584
35.94	Neospathodus	dieneri 1	246.575	2.39195
35.94	Neospathodus	dieneri 3	356.164	2.55165
35.94	Neospathodus	sp.	321.918	2.50775
35.94	Neospathodus	dieneri 2	287.671	2.4589
35.94	Neospathodus	chaohuensis	308.219	2.48886
35.94	Neospathodus	sp.	321.918	2.50775
35.94	Neospathodus	dieneri 1	232.877	2.36713
35.94	Neospathodus	chaohuensis	280.822	2.44843
35.94	Neospathodus	chaohuensis	267.123	2.42671
35.94	Neospathodus	dieneri 1	369.863	2.56804
35.94	Neospathodus	dieneri 1	356.164	2.55165
35.94	Neospathodus	sp.	404.11	2.6065
35.94	Neospathodus	sp.	308.219	2.48886
35.94	Neospathodus	dieneri 1	363.014	2.55992
35.94	Neospathodus	dieneri 2	273.973	2.43771
35.94	Neospathodus	dieneri 2	246.575	2.39195
35.94	Neospathodus	dieneri 3	321.918	2.50775
35.94	Neospathodus	dieneri 3	328.767	2.51689
35.94	Neospathodus	dieneri 1	267.123	2.42671
35.94	Neospathodus	dieneri 1	383.562	2.58384
35.94	Neospathodus	sp.	349.315	2.54322
35.94	Neospathodus	chaohuensis	349.315	2.54322
35.94	Neospathodus	sp.	301.37	2.4791
35.94	Neospathodus	dieneri 1	376.712	2.57601
35.94	Neospathodus	sp.	178.082	2.25062
35.94	Neospathodus	dieneri 2	280.822	2.44843
35.94	Neospathodus	dieneri 3	219.178	2.3408
35.94	Neospathodus	chaohuensis	472.603	2.6745
35.94	Neospathodus	dieneri 1	287.671	2.4589
35.94	Neospathodus	dieneri 2	335.616	2.52584
35.94	Neospathodus	dieneri 2	287.671	2.4589
35.94	Neospathodus	sp.	363.014	2.55992
35.94	Neospathodus	dieneri 1	376.712	2.57601
35.94	Neospathodus	dieneri 1	404.11	2.6065
35.94	Neospathodus	dieneri 2	246.575	2.39195
35.94	Neospathodus	dieneri 2	369.863	2.56804
35.94	Neospathodus	dieneri 1	404.11	2.6065
35.94	Neospathodus	dieneri 1	301.37	2.4791
35.94	Neospathodus	dieneri 1	356.164	2.55165
35.94	Neospathodus	dieneri 1	349.315	2.54322
35.94	Neospathodus	dieneri 2	363.014	2.55992
35.94	Neospathodus	sp.	383.562	2.58384
35.94	Neospathodus	dieneri 1	315.068	2.4984
35.94	Neospathodus	dieneri 2	363.014	2.55992
35.94	Neospathodus	sp.	321.918	2.50775
35.94	Neospathodus	sp.	315.068	2.4984
35.94	Neospathodus	sp.	321.918	2.50775
35.94	Neospathodus	dieneri 1	452.055	2.65519
35.94	Neospathodus	dieneri 1	267.123	2.42671
35.94	Neospathodus	dieneri 1	273.973	2.43771
35.94	Neospathodus	dieneri 1	246.575	2.39195
35.94	Neospathodus	dieneri 1	246.575	2.39195
35.94	Neospathodus	sp.	246.575	2.39195
35.94	Neospathodus	dieneri 2	452.055	2.65519
35.94	Neospathodus	dieneri 1	315.068	2.4984
35.94	Neospathodus	dieneri 3	294.521	2.46912
35.94	Neospathodus	dieneri 1	363.014	2.55992
35.94	Neospathodus	dieneri 2	232.877	2.36713
35.94	Neospathodus	sp.	226.027	2.35416
35.94	Neospathodus	dieneri 2	198.63	2.29805
35.94	Neospathodus	dieneri 1	267.123	2.42671
35.94	Neospathodus	dieneri 2	267.123	2.42671
35.94	Neospathodus	chii	260.274	2.41543
35.94	Neospathodus	dieneri 2	212.329	2.32701
35.94	Neospathodus	dieneri 2	465.753	2.66816
35.94	Neospathodus	chaohuensis	431.507	2.63499
35.94	Neospathodus	sp.	342.466	2.53462
35.94	Neospathodus	chaohuensis	308.219	2.48886
35.94	Neospathodus	dieneri 2	246.575	2.39195
35.94	Neospathodus	sp.	404.11	2.6065
35.94	Neospathodus	chaohuensis	376.712	2.57601
35.94	Neospathodus	chaohuensis	397.26	2.59908
35.94	Neospathodus	dieneri 3	376.712	2.57601
35.94	Neospathodus	sp.	301.37	2.4791
35.94	Neospathodus	sp.	308.219	2.48886
35.94	Neospathodus	chaohuensis	404.11	2.6065
35.94	Neospathodus	dieneri 3	267.123	2.42671
35.94	Neospathodus	dieneri 2	253.425	2.40385
35.94	Neospathodus	sp.	479.452	2.68075
35.94	Neospathodus	sp.	273.973	2.43771
35.94	Neospathodus	sp.	315.068	2.4984
35.94	Neospathodus	dieneri 2	267.123	2.42671
35.94	Neospathodus	dieneri 1	287.671	2.4589
35.94	Neospathodus	sp.	219.178	2.3408
35.94	Neospathodus	sp.	280.822	2.44843
35.94	Neospathodus	dieneri 2	226.027	2.35416
35.94	Neospathodus	dieneri 3	267.123	2.42671
35.94	Neospathodus	dieneri 1	212.329	2.32701
35.94	Neospathodus	dieneri 1	321.918	2.50775
35.94	Neospathodus	sp.	328.767	2.51689
35.94	Neospathodus	cristagalli	253.425	2.40385
35.94	Neospathodus	dieneri 2	212.329	2.32701
35.94	Neospathodus	dieneri 2	342.466	2.53462
35.94	Neospathodus	dieneri 2	349.315	2.54322
35.94	Neospathodus	dieneri 1	287.671	2.4589
35.94	Neospathodus	dieneri 1	321.918	2.50775
35.94	Neospathodus	dieneri 3	212.329	2.32701
35.94	Neospathodus	sp.	356.164	2.55165
35.94	Neospathodus	dieneri 1	219.178	2.3408
35.94	Neospathodus	dieneri 1	315.068	2.4984
35.94	Neospathodus	dieneri 1	356.164	2.55165
35.94	Neospathodus	chaohuensis	308.219	2.48886
35.94	Neospathodus	dieneri 2	301.37	2.4791
35.94	Neospathodus	dieneri 2	239.726	2.37972
35.94	Neospathodus	dieneri 2	280.822	2.44843
35.94	Neospathodus	dieneri 2	404.11	2.6065
35.94	Neospathodus	dieneri 2	335.616	2.52584
35.94	Neospathodus	dieneri 2	315.068	2.4984
35.94	Neospathodus	dieneri 1	226.027	2.35416
35.94	Neospathodus	dieneri 3	479.452	2.68075
35.94	Neospathodus	sp.	335.616	2.52584
35.94	Neospathodus	dieneri 3	445.205	2.64856
35.94	Neospathodus	dieneri 3	369.863	2.56804
35.94	Neospathodus	sp.	383.562	2.58384
35.94	Neospathodus	sp.	315.068	2.4984
35.94	Neospathodus	dieneri 1	335.616	2.52584
35.94	Neospathodus	dieneri 1	383.562	2.58384
35.94	Neospathodus	dieneri 1	445.205	2.64856
35.94	Neospathodus	dieneri 3	315.068	2.4984
35.94	Neospathodus	dieneri 2	308.219	2.48886
35.94	Neospathodus	dieneri 1	301.37	2.4791
35.94	Neospathodus	sp.	308.219	2.48886
35.94	Neospathodus	cristagalli	417.808	2.62098
35.94	Neospathodus	chaohuensis	294.521	2.46912
35.94	Neospathodus	dieneri 1	273.973	2.43771
35.94	Neospathodus	dieneri 3	349.315	2.54322
35.94	Neospathodus	dieneri 3	301.37	2.4791
35.94	Neospathodus	dieneri 1	335.616	2.52584
35.94	Neospathodus	dieneri 3	342.466	2.53462
35.94	Neospathodus	dieneri 2	315.068	2.4984
35.94	Neospathodus	cristagalli	465.753	2.66816
35.94	Neospathodus	dieneri 1	363.014	2.55992
35.94	Neospathodus	chaohuensis	390.411	2.59152
35.94	Neospathodus	dieneri 2	397.26	2.59908
35.94	Neospathodus	cristagalli	534.247	2.72774
35.94	Neospathodus	dieneri 1	376.712	2.57601
35.94	Neospathodus	dieneri 1	287.671	2.4589
35.94	Neospathodus	dieneri 3	287.671	2.4589
35.94	Neospathodus	dieneri 2	294.521	2.46912
35.94	Neospathodus	dieneri 1	294.521	2.46912
35.94	Neospathodus	dieneri 1	500	2.69897
35.94	Neospathodus	dieneri 1	383.562	2.58384
35.94	Neospathodus	cristagalli	335.616	2.52584
35.94	Neospathodus	sp.	376.712	2.57601
35.94	Neospathodus	sp.	328.767	2.51689
35.94	Neospathodus	dieneri 1	301.37	2.4791
35.94	Neospathodus	chaohuensis	390.411	2.59152
35.94	Neospathodus	sp.	321.918	2.50775
35.94	Neospathodus	dieneri 1	452.055	2.65519
35.94	Neospathodus	sp.	493.151	2.69298
35.94	Neospathodus	sp.	390.411	2.59152
35.94	Neospathodus	chaohuensis	452.055	2.65519
35.94	Neospathodus	chaohuensis	383.562	2.58384
35.94	Neospathodus	chaohuensis	452.055	2.65519
35.94	Neospathodus	dieneri 2	369.863	2.56804
35.94	Neospathodus	chaohuensis	383.562	2.58384
35.94	Neospathodus	dieneri 1	397.26	2.59908
35.94	Neospathodus	dieneri 1	363.014	2.55992
35.94	Neospathodus	dieneri 2	424.658	2.62804
35.94	Neospathodus	sp.	363.014	2.55992
35.94	Neospathodus	dieneri 1	301.37	2.4791
35.94	Neospathodus	dieneri 1	342.466	2.53462
35.94	Neospathodus	dieneri 2	260.274	2.41543
35.94	Neospathodus	sp.	273.973	2.43771
35.94	Neospathodus	dieneri 2	280.822	2.44843
35.94	Neospathodus	chaohuensis	445.205	2.64856
35.94	Neospathodus	cristagalli	479.452	2.68075
35.94	Neospathodus	sp.	301.37	2.4791
35.94	Neospathodus	chaohuensis	232.877	2.36713
35.94	Neospathodus	cristagalli	465.753	2.66816
35.94	Neospathodus	dieneri 1	397.26	2.59908
35.94	Neospathodus	sp.	280.822	2.44843
35.94	Neospathodus	dieneri 1	273.973	2.43771
35.94	Neospathodus	chaohuensis	294.521	2.46912
35.94	Neospathodus	dieneri 3	328.767	2.51689
35.94	Neospathodus	sp.	363.014	2.55992
35.94	Neospathodus	sp.	315.068	2.4984
35.94	Neospathodus	chaohuensis	335.616	2.52584
35.94	Neospathodus	dieneri 1	369.863	2.56804
35.94	Neospathodus	cristagalli	506.849	2.70488
35.94	Neospathodus	sp.	376.712	2.57601
35.94	Neospathodus	dieneri 1	294.521	2.46912
35.94	Neospathodus	dieneri 1	506.849	2.70488
35.94	Neospathodus	sp.	397.26	2.59908
35.94	Neospathodus	dieneri 2	328.767	2.51689
35.94	Neospathodus	dieneri 1	328.767	2.51689
35.94	Neospathodus	dieneri 1	335.616	2.52584
35.94	Neospathodus	dieneri 2	287.671	2.4589
35.94	Neospathodus	dieneri 1	226.027	2.35416
35.94	Neospathodus	dieneri 1	260.274	2.41543
35.94	Neospathodus	chaohuensis	417.808	2.62098
35.94	Neospathodus	dieneri 1	273.973	2.43771
35.94	Neospathodus	dieneri 2	184.932	2.26701
35.94	Neospathodus	dieneri 1	445.205	2.64856
35.94	Neospathodus	sp.	308.219	2.48886
35.94	Neospathodus	dieneri 2	226.027	2.35416
35.94	Neospathodus	dieneri 1	383.562	2.58384
35.94	Neospathodus	dieneri 3	164.384	2.21586
35.94	Neospathodus	cristagalli	294.521	2.46912
35.94	Neospathodus	chaohuensis	369.863	2.56804
35.94	Neospathodus	sp.	369.863	2.56804
35.94	Neospathodus	dieneri 2	267.123	2.42671
35.94	Neospathodus	dieneri 1	424.658	2.62804
35.94	Neospathodus	dieneri 3	424.658	2.62804
35.94	Neospathodus	chii	253.425	2.40385
35.94	Neospathodus	dieneri 1	287.671	2.4589
35.94	Neospathodus	sp.	260.274	2.41543
35.94	Neospathodus	dieneri 3	287.671	2.4589
35.94	Neospathodus	dieneri 2	404.11	2.6065
35.94	Neospathodus	dieneri 2	328.767	2.51689
35.94	Neospathodus	dieneri 1	321.918	2.50775
35.94	Neospathodus	chaohuensis	383.562	2.58384
35.94	Neospathodus	sp.	376.712	2.57601
35.94	Neospathodus	dieneri 1	369.863	2.56804
35.94	Neospathodus	dieneri 2	253.425	2.40385
35.94	Neospathodus	dieneri 1	397.26	2.59908
35.94	Neospathodus	cristagalli	349.315	2.54322
35.94	Neospathodus	dieneri 1	335.616	2.52584
35.94	Neospathodus	sp.	335.616	2.52584
35.94	Neospathodus	dieneri 1	232.877	2.36713
35.94	Neospathodus	dieneri 2	376.712	2.57601
35.94	Neospathodus	dieneri 1	342.466	2.53462
35.94	Neospathodus	sp.	321.918	2.50775
35.94	Neospathodus	sp.	383.562	2.58384
35.94	Neospathodus	dieneri 1	328.767	2.51689
35.94	Neospathodus	dieneri 3	349.315	2.54322
35.94	Neospathodus	dieneri 3	328.767	2.51689
35.94	Neospathodus	dieneri 3	349.315	2.54322
35.94	Neospathodus	cristagalli	342.466	2.53462
35.94	Neospathodus	cristagalli	417.808	2.62098
35.94	Neospathodus	cristagalli	472.603	2.6745
35.94	Neospathodus	sp.	369.863	2.56804
35.94	Neospathodus	dieneri 2	363.014	2.55992
35.94	Neospathodus	dieneri 1	136.986	2.13668
35.94	Neospathodus	sp.	417.808	2.62098
35.94	Neospathodus	dieneri 1	356.164	2.55165
35.94	Neospathodus	dieneri 1	239.726	2.37972
35.94	Neospathodus	dieneri 1	273.973	2.43771
35.94	Neospathodus	dieneri 3	321.918	2.50775
35.94	Neospathodus	dieneri 2	417.808	2.62098
35.94	Neospathodus	dieneri 2	226.027	2.35416
35.94	Neospathodus	dieneri 1	280.822	2.44843
35.94	Neospathodus	chaohuensis	308.219	2.48886
35.94	Neospathodus	sp.	335.616	2.52584
35.94	Neospathodus	dieneri 1	315.068	2.4984
35.94	Neospathodus	sp.	260.274	2.41543
35.94	Neospathodus	dieneri 3	397.26	2.59908
35.94	Neospathodus	cristagalli	431.507	2.63499
35.94	Neospathodus	dieneri 1	342.466	2.53462
35.94	Neospathodus	sp.	301.37	2.4791
35.94	Neospathodus	chaohuensis	205.479	2.31277
35.94	Neospathodus	sp.	287.671	2.4589
35.94	Neospathodus	sp.	280.822	2.44843
35.94	Neospathodus	cristagalli	424.658	2.62804
35.94	Neospathodus	dieneri 3	424.658	2.62804
35.94	Neospathodus	dieneri 2	335.616	2.52584
35.94	Neospathodus	dieneri 1	452.055	2.65519
35.94	Neospathodus	dieneri 1	321.918	2.50775
35.94	Neospathodus	dieneri 2	294.521	2.46912
35.94	Neospathodus	dieneri 2	239.726	2.37972
35.94	Neospathodus	dieneri 3	328.767	2.51689
35.94	Neospathodus	dieneri 3	390.411	2.59152
35.94	Neospathodus	dieneri 3	301.37	2.4791
35.94	Neospathodus	dieneri 3	397.26	2.59908
35.94	Neospathodus	sp.	369.863	2.56804
35.94	Neospathodus	dieneri 1	253.425	2.40385
35.94	Neospathodus	chaohuensis	260.274	2.41543
35.94	Neospathodus	dieneri 1	321.918	2.50775
35.94	Neospathodus	dieneri 1	301.37	2.4791
35.94	Neospathodus	dieneri 1	260.274	2.41543
35.94	Neospathodus	dieneri 2	301.37	2.4791
35.94	Neospathodus	sp.	321.918	2.50775
35.94	Neospathodus	dieneri 1	335.616	2.52584
35.94	Neospathodus	dieneri 1	315.068	2.4984
35.94	Neospathodus	dieneri 1	479.452	2.68075
35.94	Neospathodus	dieneri 1	273.973	2.43771
35.94	Neospathodus	sp.	232.877	2.36713
35.94	Neospathodus	dieneri 1	308.219	2.48886
35.94	Neospathodus	dieneri 3	260.274	2.41543
35.94	Neospathodus	dieneri 3	417.808	2.62098
35.94	Neospathodus	cristagalli	308.219	2.48886
35.94	Neospathodus	dieneri 1	349.315	2.54322
35.94	Neospathodus	cristagalli	383.562	2.58384
35.94	Neospathodus	dieneri 2	260.274	2.41543
35.94	Neospathodus	cristagalli	527.397	2.72214
35.94	Neospathodus	dieneri 1	308.219	2.48886
35.94	Neospathodus	dieneri 1	335.616	2.52584
35.94	Neospathodus	dieneri 1	171.233	2.23359
35.94	Neospathodus	dieneri 2	273.973	2.43771
35.94	Neospathodus	dieneri 3	328.767	2.51689
35.94	Neospathodus	dieneri 1	301.37	2.4791
35.94	Neospathodus	dieneri 3	363.014	2.55992
35.94	Neospathodus	dieneri 3	253.425	2.40385
35.94	Neospathodus	sp.	232.877	2.36713
35.94	Neospathodus	chaohuensis	315.068	2.4984
35.94	Neospathodus	sp.	287.671	2.4589
35.94	Neospathodus	sp.	335.616	2.52584
35.94	Neospathodus	sp.	232.877	2.36713
35.94	Neospathodus	dieneri 3	363.014	2.55992
35.94	Neospathodus	sp.	212.329	2.32701
35.94	Neospathodus	dieneri 1	294.521	2.46912
35.94	Neospathodus	cristagalli	301.37	2.4791
35.94	Neospathodus	cristagalli	342.466	2.53462
35.94	Neospathodus	sp.	267.123	2.42671
35.94	Neospathodus	dieneri 3	308.219	2.48886
35.94	Neospathodus	cristagalli	465.753	2.66816
35.94	Neospathodus	chaohuensis	363.014	2.55992
36.34	Sweetospathodus	kummeli	387.342	2.58809
36.34	Neospathodus	sp.	356.962	2.55262
36.34	Sweetospathodus	kummeli	273.973	2.43771
37.64	Sweetospathodus	kummeli	321.918	2.50775
37.64	Neospathodus	sp.	294.521	2.46912
37.94	Neospathodus	dieneri 1	301.37	2.4791
37.94	Neospathodus	sp.	280.822	2.44843
37.94	Neospathodus	cristagalli	308.219	2.48886
37.94	Sweetospathodus	kummeli	267.123	2.42671
37.94	Sweetospathodus	kummeli	246.575	2.39195
37.94	Sweetospathodus	kummeli	232.877	2.36713
37.94	Sweetospathodus	kummeli	280.822	2.44843
37.94	Neospathodus	cristagalli	253.425	2.40385
37.94	Neospathodus	cristagalli	260.274	2.41543
37.94	Neospathodus	cristagalli	287.671	2.4589
37.94	Neospathodus	cristagalli	328.767	2.51689
43.64	Neospathodus	cristagalli	335.616	2.52584
43.64	Neospathodus	cristagalli	315.068	2.4984
43.64	Neospathodus	dieneri 1	253.425	2.40385
43.64	Neospathodus	cristagalli	369.863	2.56804
43.64	Neospathodus	cristagalli	315.068	2.4984
43.64	Neospathodus	chaohuensis	465.753	2.66816
43.64	Neospathodus	dieneri 1	246.575	2.39195
43.64	Neospathodus	cristagalli	226.027	2.35416
43.64	Neospathodus	tongi	390.411	2.59152
43.64	Neospathodus	cristagalli	321.918	2.50775
43.64	Neospathodus	cristagalli	328.767	2.51689
43.94	Neospathodus	cristagalli	520.253	2.71621
43.94	Neospathodus	dieneri 1	249.057	2.3963
43.94	Neospathodus	dieneri 3	271.698	2.43409
44.34	Neospathodus	dieneri 2	315.068	2.4984
45.54	Neospathodus	dieneri 1	198.63	2.29805
45.54	Neospathodus	sp.	191.781	2.28281
45.54	Neospathodus	cristagalli	315.068	2.4984
45.54	Neospathodus	cristagalli	328.767	2.51689
45.54	Neospathodus	cristagalli	260.274	2.41543
45.54	Neospathodus	sp.	287.671	2.4589
45.54	Neospathodus	dieneri 1	321.918	2.50775
45.54	Neospathodus	dieneri 2	397.26	2.59908
45.54	Neospathodus	sp.	383.562	2.58384
45.54	Neospathodus	dieneri 3	267.123	2.42671
45.54	Neospathodus	dieneri 2	410.959	2.6138
45.54	Neospathodus	cristagalli	417.808	2.62098
45.54	Neospathodus	sp.	383.562	2.58384
45.54	Neospathodus	sp.	424.658	2.62804
49.16	Neospathodus	dieneri 2	267.123	2.42671
49.16	Neospathodus	dieneri 3	246.575	2.39195
49.16	Neospathodus	dieneri 3	273.973	2.43771
49.16	Neospathodus	dieneri 3	301.37	2.4791
49.16	Neospathodus	dieneri 3	212.329	2.32701
49.16	Neospathodus	dieneri 3	349.315	2.54322
49.16	Neospathodus	dieneri 1	226.027	2.35416
49.16	Neospathodus	dieneri 2	178.082	2.25062
49.16	Neospathodus	dieneri 3	184.932	2.26701
49.16	Neospathodus	dieneri 1	232.877	2.36713
49.16	Neospathodus	sp.	198.63	2.29805
49.16	Neospathodus	dieneri 1	246.575	2.39195
49.16	Neospathodus	dieneri 1	212.329	2.32701
49.16	Neospathodus	dieneri 1	226.027	2.35416
49.16	Neospathodus	dieneri 2	171.233	2.23359
49.16	Neospathodus	dieneri 1	260.274	2.41543
49.16	Neospathodus	dieneri 1	226.027	2.35416
49.16	Neospathodus	dieneri 2	150.685	2.17807
49.16	Neospathodus	dieneri 2	260.274	2.41543
49.16	Neospathodus	dieneri 2	246.575	2.39195
49.16	Neospathodus	dieneri 1	226.027	2.35416
49.16	Neospathodus	dieneri 1	246.575	2.39195
49.16	Neospathodus	dieneri 1	219.178	2.3408
49.16	Neospathodus	dieneri 2	246.575	2.39195
49.16	Neospathodus	dieneri 1	205.479	2.31277
49.16	Neospathodus	dieneri 1	164.384	2.21586
49.16	Neospathodus	dieneri 3	273.973	2.43771
49.16	Neospathodus	dieneri 2	171.233	2.23359
49.16	Neospathodus	dieneri 2	301.37	2.4791
49.16	Neospathodus	dieneri 2	267.123	2.42671
49.16	Neospathodus	dieneri 3	191.781	2.28281
49.16	Neospathodus	dieneri 1	232.877	2.36713
49.16	Neospathodus	dieneri 3	184.932	2.26701
49.16	Neospathodus	dieneri 1	219.178	2.3408
49.16	Neospathodus	dieneri 3	280.822	2.44843
49.16	Neospathodus	dieneri 2	294.521	2.46912
49.16	Neospathodus	dieneri 2	239.726	2.37972
49.16	Neospathodus	dieneri 3	294.521	2.46912
49.16	Neospathodus	dieneri 3	294.521	2.46912
49.16	Neospathodus	chaohuensis	369.863	2.56804
49.16	Neospathodus	sp.	294.521	2.46912
49.16	Neospathodus	dieneri 3	260.274	2.41543
49.16	Neospathodus	dieneri 3	315.068	2.4984
49.16	Neospathodus	dieneri 1	315.068	2.4984
49.16	Neospathodus	sp.	226.027	2.35416
49.16	Neospathodus	dieneri 3	328.767	2.51689
49.16	Neospathodus	dieneri 3	342.466	2.53462
49.16	Neospathodus	dieneri 1	308.219	2.48886
49.16	Neospathodus	dieneri 2	301.37	2.4791
49.16	Neospathodus	dieneri 1	253.425	2.40385
49.16	Neospathodus	dieneri 3	232.877	2.36713
49.16	Neospathodus	dieneri 1	280.822	2.44843
49.16	Neospathodus	dieneri 3	321.918	2.50775
49.16	Neospathodus	dieneri 2	219.178	2.3408
49.16	Neospathodus	dieneri 3	321.918	2.50775
49.16	Neospathodus	dieneri 1	273.973	2.43771
49.16	Neospathodus	dieneri 3	226.027	2.35416
49.16	Neospathodus	dieneri 3	246.575	2.39195
49.16	Neospathodus	dieneri 3	308.219	2.48886
49.16	Neospathodus	dieneri 3	369.863	2.56804
49.16	Neospathodus	dieneri 1	253.425	2.40385
49.16	Neospathodus	dieneri 2	198.63	2.29805
49.16	Neospathodus	dieneri 1	232.877	2.36713
49.16	Neospathodus	dieneri 2	267.123	2.42671
49.16	Neospathodus	dieneri 1	356.164	2.55165
49.16	Neospathodus	dieneri 1	287.671	2.4589
49.16	Neospathodus	dieneri 1	308.219	2.48886
49.16	Neospathodus	dieneri 1	226.027	2.35416
49.16	Neospathodus	dieneri 1	178.082	2.25062
49.16	Neospathodus	dieneri 1	184.932	2.26701
49.16	Neospathodus	dieneri 1	260.274	2.41543
49.16	Neospathodus	dieneri 1	191.781	2.28281
49.16	Neospathodus	dieneri 1	267.123	2.42671
49.16	Neospathodus	dieneri 1	232.877	2.36713
49.16	Neospathodus	dieneri 3	315.068	2.4984
49.16	Neospathodus	dieneri 3	369.863	2.56804
49.16	Neospathodus	dieneri 1	178.082	2.25062
49.16	Neospathodus	dieneri 1	458.904	2.66172
49.16	Neospathodus	dieneri 1	294.521	2.46912
49.16	Neospathodus	dieneri 2	219.178	2.3408
49.16	Neospathodus	dieneri 1	294.521	2.46912
49.16	Neospathodus	dieneri 1	280.822	2.44843
49.16	Neospathodus	dieneri 3	308.219	2.48886
49.16	Neospathodus	dieneri 1	336.364	2.52681
49.16	Neospathodus	dieneri 1	693.671	2.84115
49.16	Neospathodus	dieneri 1	321.519	2.50721
49.16	Neospathodus	dieneri 2	379.747	2.57949
49.16	Neospathodus	dieneri 1	326.582	2.51399
49.16	Neospathodus	dieneri 1	362.025	2.55874
49.16	Neospathodus	dieneri 1	287.671	2.4589
49.16	Neospathodus	dieneri 1	413.115	2.61607
49.16	Neospathodus	dieneri 1	282.192	2.45054
49.16	Neospathodus	dieneri 2	347.541	2.54101
49.16	Neospathodus	dieneri 2	413.333	2.6163
49.16	Neospathodus	dieneri 2	324.051	2.51061
49.16	Neospathodus	chii	426.087	2.6295
49.16	Neospathodus	chaohuensis	464.407	2.6669
49.16	Neospathodus	dieneri 1	423.188	2.62653
49.16	Neospathodus	dieneri 1	407.843	2.61049
49.16	Neospathodus	dieneri 1	425.316	2.62871
49.16	Neospathodus	dieneri 2	354.545	2.54967
49.16	Neospathodus	dieneri 2	267.123	2.42671
49.16	Neospathodus	dieneri 1	246.575	2.39195
49.16	Neospathodus	dieneri 1	232.877	2.36713
49.16	Neospathodus	dieneri 1	253.425	2.40385
49.16	Neospathodus	sp.	308.219	2.48886
49.16	Neospathodus	sp.	335.616	2.52584
49.16	Neospathodus	sp.	232.877	2.36713
49.16	Neospathodus	sp.	260.274	2.41543
49.16	Neospathodus	dieneri 1	315.068	2.4984
49.16	Neospathodus	dieneri 2	273.973	2.43771
49.16	Neospathodus	dieneri 1	328.767	2.51689
49.16	Neospathodus	dieneri 1	260.274	2.41543
49.16	Neospathodus	dieneri 1	226.027	2.35416
49.16	Neospathodus	dieneri 1	294.521	2.46912
49.16	Neospathodus	dieneri 2	273.973	2.43771
49.16	Neospathodus	sp.	157.534	2.19737
49.16	Neospathodus	sp.	294.521	2.46912
49.16	Neospathodus	chaohuensis	226.027	2.35416
49.16	Neospathodus	dieneri 1	273.973	2.43771
49.16	Neospathodus	dieneri 1	280.822	2.44843
49.16	Neospathodus	dieneri 3	315.068	2.4984
49.16	Neospathodus	dieneri 4	253.425	2.40385
49.16	Neospathodus	chaohuensis	369.863	2.56804
49.16	Neospathodus	dieneri 1	219.178	2.3408
49.16	Neospathodus	dieneri 3	212.329	2.32701
49.16	Neospathodus	dieneri 1	267.123	2.42671
49.16	Neospathodus	dieneri 1	383.562	2.58384
49.16	Neospathodus	dieneri 1	308.219	2.48886
49.16	Neospathodus	sp.	239.726	2.37972
49.16	Neospathodus	chii	260.274	2.41543
49.16	Neospathodus	dieneri 2	376.712	2.57601
49.16	Neospathodus	dieneri 3	287.671	2.4589
49.16	Neospathodus	dieneri 3	171.233	2.23359
49.16	Neospathodus	dieneri 1	287.671	2.4589
49.16	Neospathodus	dieneri 1	260.274	2.41543
49.16	Neospathodus	dieneri 1	315.068	2.4984
49.16	Neospathodus	dieneri 1	369.863	2.56804
49.16	Neospathodus	dieneri 1	513.699	2.71071
49.16	Neospathodus	dieneri 2	315.068	2.4984
49.16	Neospathodus	sp.	424.658	2.62804
49.16	Neospathodus	dieneri 3	595.89	2.77517
49.16	Neospathodus	dieneri 3	376.712	2.57601
49.16	Neospathodus	dieneri 3	397.26	2.59908
49.16	Neospathodus	dieneri 3	383.562	2.58384
49.16	Neospathodus	dieneri 1	486.301	2.68691
49.16	Neospathodus	dieneri 1	287.671	2.4589
49.16	Neospathodus	dieneri 1	438.356	2.64183
49.16	Neospathodus	sp.	260.274	2.41543
49.16	Neospathodus	sp.	363.014	2.55992
49.16	Neospathodus	dieneri 1	561.644	2.74946
49.16	Neospathodus	dieneri 1	397.26	2.59908
49.16	Neospathodus	dieneri 1	219.178	2.3408
49.16	Neospathodus	dieneri 1	308.219	2.48886
49.16	Neospathodus	dieneri 1	253.425	2.40385
49.16	Neospathodus	sp.	294.521	2.46912
49.16	Neospathodus	chaohuensis	267.123	2.42671
49.16	Neospathodus	dieneri 1	246.575	2.39195
49.16	Neospathodus	dieneri 3	321.918	2.50775
49.16	Neospathodus	dieneri 1	315.068	2.4984
49.16	Neospathodus	dieneri 1	212.329	2.32701
49.16	Neospathodus	dieneri 1	301.37	2.4791
49.16	Neospathodus	dieneri 1	315.068	2.4984
49.16	Neospathodus	dieneri 1	260.274	2.41543
50.96	Discretella	discreta	287.671	2.4589
50.96	Neospathodus	cristagalli	369.863	2.56804
50.96	Neospathodus	cristagalli	424.658	2.62804
50.96	Neospathodus	cristagalli	198.63	2.29805
50.96	Neospathodus	cristagalli	547.945	2.73874
50.96	Neospathodus	cristagalli	712.329	2.85268
50.96	Neospathodus	cristagalli	465.753	2.66816
50.96	Neospathodus	cristagalli	184.932	2.26701
50.96	Neospathodus	cristagalli	520.548	2.71646
50.96	Neospathodus	cristagalli	280.822	2.44843
50.96	Neospathodus	cristagalli	390.411	2.59152
50.96	Neospathodus	cristagalli	287.671	2.4589
50.96	Neospathodus	cristagalli	486.301	2.68691
50.96	Neospathodus	cristagalli	500	2.69897
50.96	Neospathodus	cristagalli	390.411	2.59152
50.96	Neospathodus	cristagalli	315.068	2.4984
50.96	Neospathodus	cristagalli	500	2.69897
50.96	Neospathodus	cristagalli	479.452	2.68075
50.96	Neospathodus	cristagalli	397.26	2.59908
50.96	Neospathodus	cristagalli	664.384	2.82242
50.96	Neospathodus	cristagalli	602.74	2.78013
50.96	Neospathodus	cristagalli	534.247	2.72774
50.96	Neospathodus	cristagalli	417.808	2.62098
50.96	Neospathodus	cristagalli	554.795	2.74413
50.96	Neospathodus	cristagalli	356.164	2.55165
50.96	Neospathodus	cristagalli	342.466	2.53462
50.96	Neospathodus	cristagalli	520.548	2.71646
50.96	Neospathodus	cristagalli	424.658	2.62804
50.96	Neospathodus	cristagalli	431.507	2.63499
50.96	Neospathodus	cristagalli	390.411	2.59152
50.96	Neospathodus	cristagalli	465.753	2.66816
50.96	Neospathodus	cristagalli	397.26	2.59908
50.96	Neospathodus	cristagalli	404.11	2.6065
50.96	Neospathodus	cristagalli	616.438	2.78989
50.96	Neospathodus	cristagalli	383.562	2.58384
50.96	Neospathodus	cristagalli	582.192	2.76507
50.96	Neospathodus	cristagalli	363.014	2.55992
50.96	Neospathodus	cristagalli	445.205	2.64856
50.96	Neospathodus	cristagalli	328.767	2.51689
50.96	Neospathodus	cristagalli	452.055	2.65519
50.96	Neospathodus	cristagalli	506.849	2.70488
50.96	Neospathodus	cristagalli	561.644	2.74946
50.96	Neospathodus	cristagalli	486.301	2.68691
50.96	Neospathodus	cristagalli	349.315	2.54322
50.96	Neospathodus	cristagalli	232.877	2.36713
50.96	Neospathodus	cristagalli	493.151	2.69298
50.96	Neospathodus	cristagalli	410.959	2.6138
50.96	Neospathodus	cristagalli	342.466	2.53462
50.96	Neospathodus	cristagalli	513.699	2.71071
50.96	Neospathodus	cristagalli	232.877	2.36713
50.96	Neospathodus	cristagalli	527.397	2.72214
50.96	Neospathodus	cristagalli	308.219	2.48886
50.96	Neospathodus	cristagalli	465.753	2.66816
50.96	Neospathodus	cristagalli	500	2.69897
50.96	Neospathodus	cristagalli	410.959	2.6138
50.96	Neospathodus	cristagalli	630.137	2.79943
50.96	Neospathodus	cristagalli	383.562	2.58384
50.96	Neospathodus	cristagalli	397.26	2.59908
50.96	Neospathodus	cristagalli	349.315	2.54322
50.96	Neospathodus	cristagalli	308.219	2.48886
50.96	Neospathodus	cristagalli	438.356	2.64183
50.96	Neospathodus	cristagalli	410.959	2.6138
50.96	Neospathodus	cristagalli	376.712	2.57601
50.96	Neospathodus	cristagalli	417.808	2.62098
50.96	Neospathodus	cristagalli	390.411	2.59152
50.96	Neospathodus	cristagalli	404.11	2.6065
50.96	Neospathodus	cristagalli	301.37	2.4791
50.96	Neospathodus	cristagalli	623.288	2.79469
50.96	Neospathodus	cristagalli	582.192	2.76507
50.96	Neospathodus	cristagalli	390.411	2.59152
50.96	Neospathodus	cristagalli	534.247	2.72774
50.96	Neospathodus	cristagalli	273.973	2.43771
50.96	Neospathodus	cristagalli	404.11	2.6065
50.96	Neospathodus	cristagalli	458.904	2.66172
50.96	Neospathodus	cristagalli	616.438	2.78989
50.96	Neospathodus	cristagalli	328.767	2.51689
50.96	Neospathodus	cristagalli	616.438	2.78989
50.96	Neospathodus	cristagalli	349.315	2.54322
50.96	Neospathodus	cristagalli	438.356	2.64183
50.96	Neospathodus	cristagalli	178.082	2.25062
50.96	Neospathodus	cristagalli	472.603	2.6745
50.96	Neospathodus	cristagalli	397.26	2.59908
50.96	Neospathodus	cristagalli	404.11	2.6065
50.96	Neospathodus	cristagalli	390.411	2.59152
50.96	Neospathodus	cristagalli	417.808	2.62098
50.96	Neospathodus	cristagalli	849.315	2.92907
50.96	Neospathodus	cristagalli	342.466	2.53462
50.96	Neospathodus	cristagalli	301.37	2.4791
50.96	Neospathodus	cristagalli	308.219	2.48886
50.96	Neospathodus	cristagalli	376.712	2.57601
50.96	Neospathodus	cristagalli	184.932	2.26701
50.96	Neospathodus	cristagalli	356.164	2.55165
50.96	Neospathodus	cristagalli	328.767	2.51689
50.96	Neospathodus	cristagalli	520.548	2.71646
50.96	Neospathodus	cristagalli	445.205	2.64856
50.96	Neospathodus	cristagalli	445.205	2.64856
50.96	Neospathodus	cristagalli	383.562	2.58384
50.96	Neospathodus	cristagalli	390.411	2.59152
50.96	Neospathodus	cristagalli	534.247	2.72774
50.96	Neospathodus	cristagalli	445.205	2.64856
50.96	Neospathodus	cristagalli	424.658	2.62804
50.96	Neospathodus	cristagalli	328.767	2.51689
50.96	Neospathodus	cristagalli	438.356	2.64183
50.96	Neospathodus	cristagalli	684.932	2.83565
50.96	Neospathodus	cristagalli	301.37	2.4791
50.96	Neospathodus	cristagalli	513.699	2.71071
50.96	Neospathodus	cristagalli	349.315	2.54322
50.96	Neospathodus	dieneri 1	273.973	2.43771
50.96	Neospathodus	dieneri 2	267.123	2.42671
50.96	Neospathodus	dieneri 2	452.055	2.65519
50.96	Neospathodus	dieneri 2	253.425	2.40385
50.96	Neospathodus	dieneri 3	356.164	2.55165
50.96	Neospathodus	dieneri 3	280.822	2.44843
50.96	Neospathodus	dieneri 3	369.863	2.56804
50.96	Neospathodus	dieneri 3	280.822	2.44843
50.96	Neospathodus	dieneri 3	404.11	2.6065
50.96	Neospathodus	dieneri 3	212.329	2.32701
50.96	Neospathodus	dieneri 3	184.932	2.26701
50.96	Neospathodus	dieneri 3	191.781	2.28281
50.96	Neospathodus	dieneri 3	301.37	2.4791
50.96	Neospathodus	dieneri 3	465.753	2.66816
50.96	Neospathodus	dieneri 3	273.973	2.43771
50.96	Neospathodus	novaehollandiae	726.027	2.86095
50.96	Neospathodus	novaehollandiae	773.973	2.88873
50.96	Neospathodus	novaehollandiae	541.096	2.73327
50.96	Neospathodus	novaehollandiea	1116.44	3.04783
50.96	Neospathodus	novaehollandiea	1047.95	3.02034
50.96	Neospathodus	pakistanensis	465.753	2.66816
50.96	Neospathodus	pakistanensis	500	2.69897
50.96	Neospathodus	pakistanensis	746.575	2.87307
50.96	Neospathodus	pakistanensis	863.014	2.93602
50.96	Neospathodus	pakistanensis	575.342	2.75993
50.96	Neospathodus	pakistanensis	630.137	2.79943
50.96	Neospathodus	pakistanensis	369.863	2.56804
50.96	Neospathodus	pakistanensis	520.548	2.71646
50.96	Neospathodus	pakistanensis	342.466	2.53462
50.96	Neospathodus	pakistanensis	945.205	2.97553
50.96	Neospathodus	pakistanensis	1027.4	3.01174
50.96	Neospathodus	pakistanensis	671.233	2.82687
50.96	Neospathodus	pakistanensis	595.89	2.77517
50.96	Neospathodus	pakistanensis	280.822	2.44843
50.96	Neospathodus	pakistanensis	773.973	2.88873
50.96	Neospathodus	pakistanensis	972.603	2.98794
50.96	Neospathodus	pakistanensis	609.589	2.78504
50.96	Neospathodus	pakistanensis	547.945	2.73874
50.96	Neospathodus	pakistanensis	321.918	2.50775
50.96	Neospathodus	pakistanensis	821.918	2.91483
50.96	Neospathodus	pakistanensis	856.164	2.93256
50.96	Neospathodus	pakistanensis	671.233	2.82687
50.96	Neospathodus	pakistanensis	780.822	2.89255
50.96	Neospathodus	pakistanensis	691.781	2.83997
50.96	Neospathodus	pakistanensis	678.082	2.83128
50.96	Neospathodus	pakistanensis	575.342	2.75993
50.96	Neospathodus	pakistanensis	383.562	2.58384
50.96	Neospathodus	pakistanensis	595.89	2.77517
50.96	Neospathodus	pakistanensis	678.082	2.83128
50.96	Neospathodus	pakistanensis	1123.29	3.05049
50.96	Neospathodus	pakistanensis	541.096	2.73327
50.96	Neospathodus	pakistanensis	294.521	2.46912
50.96	Neospathodus	pakistanensis	410.959	2.6138
50.96	Neospathodus	pakistanensis	691.781	2.83997
50.96	Neospathodus	pakistanensis	417.808	2.62098
50.96	Neospathodus	pakistanensis	869.863	2.93945
50.96	Neospathodus	pakistanensis	500	2.69897
50.96	Neospathodus	pakistanensis	595.89	2.77517
50.96	Neospathodus	pakistanensis	561.644	2.74946
50.96	Neospathodus	sp.	643.836	2.80877
50.96	Neospathodus	sp.	691.781	2.83997
50.96	Neospathodus	sp.	465.753	2.66816
50.96	Neospathodus	sp.	732.877	2.86503
50.96	Neospathodus	sp.	554.795	2.74413
50.96	Neospathodus	sp.	294.521	2.46912
50.96	Neospathodus	sp.	260.274	2.41543
50.96	Neospathodus	sp.	602.74	2.78013
50.96	Neospathodus	sp.	445.205	2.64856
50.96	Neospathodus	sp.	342.466	2.53462
50.96	Neospathodus	sp.	219.178	2.3408
50.96	Neospathodus	sp.	376.712	2.57601
50.96	Neospathodus	sp.	363.014	2.55992
50.96	Neospathodus	sp.	280.822	2.44843
50.96	Neospathodus	sp.	369.863	2.56804
50.96	Neospathodus	sp.	287.671	2.4589
50.96	Neospathodus	sp.	260.274	2.41543
50.96	Neospathodus	sp.	356.164	2.55165
50.96	Neospathodus	sp.	924.658	2.96598
50.96	Neospathodus	sp.	308.219	2.48886
50.96	Neospathodus	sp.	328.767	2.51689
50.96	Neospathodus	sp.	547.945	2.73874
50.96	Neospathodus	sp.	602.74	2.78013
50.96	Neospathodus	sp.	746.575	2.87307
50.96	Neospathodus	sp.	280.822	2.44843
50.96	Neospathodus	sp.	363.014	2.55992
50.96	Neospathodus	cristagalli	636.986	2.80413
50.96	Neospathodus	cristagalli	445.205	2.64856
50.96	Neospathodus	cristagalli	561.644	2.74946
50.96	Neospathodus	cristagalli	458.904	2.66172
50.96	Neospathodus	cristagalli	383.562	2.58384
50.96	Neospathodus	cristagalli	582.192	2.76507
50.96	Neospathodus	cristagalli	383.562	2.58384
50.96	Neospathodus	cristagalli	506.849	2.70488
50.96	Neospathodus	cristagalli	328.767	2.51689
50.96	Neospathodus	cristagalli	369.863	2.56804
50.96	Neospathodus	cristagalli	349.315	2.54322
50.96	Neospathodus	cristagalli	643.836	2.80877
50.96	Neospathodus	cristagalli	527.397	2.72214
50.96	Neospathodus	cristagalli	404.11	2.6065
50.96	Neospathodus	cristagalli	595.89	2.77517
50.96	Neospathodus	cristagalli	404.11	2.6065
50.96	Neospathodus	cristagalli	321.918	2.50775
50.96	Neospathodus	cristagalli	376.712	2.57601
50.96	Neospathodus	cristagalli	479.452	2.68075
50.96	Neospathodus	cristagalli	335.616	2.52584
50.96	Neospathodus	dieneri 3	534.247	2.72774
50.96	Neospathodus	dieneri 3	636.986	2.80413
50.96	Neospathodus	dieneri 3	294.521	2.46912
50.96	Neospathodus	dieneri 3	157.534	2.19737
50.96	Neospathodus	dieneri 3	157.534	2.19737
50.96	Neospathodus	dieneri 3	356.164	2.55165
50.96	Neospathodus	pakistaneisis	808.219	2.90753
50.96	Neospathodus	pakistaneisis	1212.33	3.08362
50.96	Neospathodus	pakistaneisis	602.74	2.78013
50.96	Neospathodus	pakistaneisis	643.836	2.80877
50.96	Neospathodus	pakistaneisis	773.973	2.88873
50.96	Neospathodus	pakistaneisis	472.603	2.6745
50.96	Neospathodus	pakistaneisis	801.37	2.90383
50.96	Neospathodus	pakistaneisis	1013.7	3.00591
50.96	Neospathodus	pakistaneisis	561.644	2.74946
50.96	Neospathodus	pakistanensis	931.507	2.96919
50.96	Neospathodus	pakistanensis	787.671	2.89634
50.96	Neospathodus	pakistanensis	554.795	2.74413
50.96	Neospathodus	sp.	1020.55	3.00883
50.96	Neospathodus	sp.	349.315	2.54322
50.96	Neospathodus	sp.	712.329	2.85268
50.96	Neospathodus	sp.	684.932	2.83565
50.96	Novispathodus	posterolongatus	582.192	2.76507
50.96	Novispathodus	sp.	335.616	2.52584
50.96	Novispathodus	waageni eowaageni	404.11	2.6065
50.96	Novispathodus	waageni eowaageni	595.89	2.77517
50.96	Novispathodus	waageni eowaageni	486.301	2.68691
50.96	Novispathodus	waageni waageni	575.342	2.75993
50.96	Novispathodus	waageni waageni	308.219	2.48886
50.96	Novispathodus	waageni waageni	328.767	2.51689
50.96	Novispathodus	waageni waageni	267.123	2.42671
50.96	Novispathodus	waageni waageni	500	2.69897
50.96	Novispathodus	waageni waageni	404.11	2.6065
50.96	Novispathodus	waageni waageni	376.712	2.57601
50.96	Novispathodus	waageni waageni	356.164	2.55165
50.96	Novispathodus	waageni waageni	267.123	2.42671
50.96	Novispathodus	waageni waageni	356.164	2.55165
50.96	Novispathodus	waageni waageni	157.534	2.19737
50.96	Novispathodus	waageni waageni	376.712	2.57601
50.96	Novispathodus	waageni waageni	417.808	2.62098
50.96	Novispathodus	waageni waageni	363.014	2.55992
50.96	Novispathodus	waageni waageni	369.863	2.56804
50.96	Novispathodus	waageni waageni	349.315	2.54322
50.96	Novispathodus	waageni waageni	493.151	2.69298
50.96	Novispathodus	waageni waageni	349.315	2.54322
50.96	Novispathodus	waageni waageni	287.671	2.4589
50.96	Novispathodus	waageni waageni	356.164	2.55165
50.96	Novispathodus	waageni waageni	404.11	2.6065
50.96	Novispathodus	waageni waageni	397.26	2.59908
50.96	Novispathodus	waageni waageni	383.562	2.58384
50.96	Novispathodus	waageni waageni	376.712	2.57601
50.96	Novispathodus	waageni waageni	541.096	2.73327
50.96	Novispathodus	waageni waageni	575.342	2.75993
50.96	Novispathodus	waageni waageni	404.11	2.6065
50.96	Novispathodus	waageni waageni	198.63	2.29805
50.96	Novispathodus	waageni waageni	500	2.69897
50.96	Novispathodus	waageni waageni	287.671	2.4589
50.96	Novispathodus	waageni waageni	410.959	2.6138
50.96	Novispathodus	waageni waageni	458.904	2.66172
50.96	Novispathodus	waageni waageni	582.192	2.76507
50.96	Novispathodus	waagnei waageni	335.616	2.52584
50.96	Novispathodus	posterolongatus	630.137	2.79943
50.96	Novispathodus	posterolongatus	541.096	2.73327
50.96	Novispathodus	waageni eowaageni	589.041	2.77015
50.96	Novispathodus	waageni waageni	452.055	2.65519
50.96	Novispathodus	waageni waageni	301.37	2.4791
50.96	Novispathodus	waageni waageni	369.863	2.56804
50.96	Novispathodus	waageni waageni	438.356	2.64183
50.96	Novispathodus	waageni waageni	280.822	2.44843
50.96	Novispathodus	waageni waageni	424.658	2.62804
50.96	Novispathodus	waageni waageni	376.712	2.57601
50.96	Novispathodus	waageni waageni	356.164	2.55165
50.96	Parachiognathus	peculiaris	541.096	2.73327
50.96	Parachirognathus	peculiaris	527.397	2.72214
50.96	Parachirognathus	peculiaris	513.699	2.71071
50.96	Eurygnathodus	coatatus	493.151	2.69298
50.96	Eurygnathodus	coatatus	561.644	2.74946
50.96	Eurygnathodus	coatatus	424.658	2.62804
50.96	Eurygnathodus	coatatus	445.205	2.64856
50.96	Eurygnathodus	coatatus	438.356	2.64183
50.96	Eurygnathodus	coatatus	315.068	2.4984
50.96	Eurygnathodus	coatatus	431.507	2.63499
50.96	Eurygnathodus	coatatus	294.521	2.46912
50.96	Eurygnathodus	coatatus	609.589	2.78504
50.96	Eurygnathodus	coatatus	424.658	2.62804
50.96	Eurygnathodus	coatatus	438.356	2.64183
50.96	Eurygnathodus	coatatus	561.644	2.74946
50.96	Eurygnathodus	coatatus	383.562	2.58384
50.96	Eurygnathodus	coatatus	363.014	2.55992
50.96	Eurygnathodus	costatus	280.822	2.44843
50.96	Eurygnathodus	costatus	650.685	2.81337
50.96	Eurygnathodus	costatus	438.356	2.64183
50.96	Eurygnathodus	costatus	554.795	2.74413
50.96	Eurygnathodus	costatus	458.904	2.66172
50.96	Eurygnathodus	costatus	493.151	2.69298
50.96	Eurygnathodus	costatus	335.616	2.52584
50.96	Eurygnathodus	costatus	315.068	2.4984
50.96	Eurygnathodus	costatus	397.26	2.59908
50.96	Eurygnathodus	costatus	328.767	2.51689
50.96	Eurygnathodus	costatus	431.507	2.63499
50.96	Eurygnathodus	costatus	684.932	2.83565
50.96	Eurygnathodus	costatus	431.507	2.63499
50.96	Eurygnathodus	costatus	349.315	2.54322
50.96	Eurygnathodus	costatus	280.822	2.44843
50.96	Eurygnathodus	costatus	479.452	2.68075
50.96	Eurygnathodus	costatus	479.452	2.68075
50.96	Eurygnathodus	costatus	376.712	2.57601
50.96	Eurygnathodus	costatus	547.945	2.73874
50.96	Eurygnathodus	costatus	671.233	2.82687
50.96	Eurygnathodus	costatus	452.055	2.65519
50.96	Eurygnathodus	costatus	349.315	2.54322
50.96	Eurygnathodus	costatus	424.658	2.62804
50.96	Eurygnathodus	costatus	424.658	2.62804
50.96	Eurygnathodus	costatus	458.904	2.66172
50.96	Eurygnathodus	costatus	465.753	2.66816
50.96	Eurygnathodus	costatus	321.918	2.50775
50.96	Eurygnathodus	costatus	328.767	2.51689
50.96	Eurygnathodus	costatus	417.808	2.62098
50.96	Eurygnathodus	costatus	246.575	2.39195
50.96	Eurygnathodus	costatus	335.616	2.52584
50.96	Eurygnathodus	costatus	410.959	2.6138
50.96	Eurygnathodus	costatus	397.26	2.59908
50.96	Eurygnathodus	costatus	397.26	2.59908
50.96	Eurygnathodus	costatus	410.959	2.6138
50.96	Eurygnathodus	costatus	321.918	2.50775
50.96	Eurygnathodus	costatus	253.425	2.40385
50.96	Eurygnathodus	costatus	547.945	2.73874
50.96	Eurygnathodus	costatus	712.329	2.85268
50.96	Eurygnathodus	costatus	431.507	2.63499
50.96	Eurygnathodus	costatus	787.671	2.89634
50.96	Eurygnathodus	costatus	363.014	2.55992
50.96	Eurygnathodus	hamadai	506.849	2.70488
50.96	Eurygnathodus	hamadai	472.603	2.6745
50.96	Eurygnathodus	hamadai	712.329	2.85268
50.96	Eurygnathodus	hamadai	582.192	2.76507
50.96	Eurygnathodus	hamadai	500	2.69897
50.96	Eurygnathodus	hamadai	527.397	2.72214
50.96	Eurygnathodus	hamadai	452.055	2.65519
50.96	Eurygnathodus	hamadai	657.534	2.81792
50.96	Eurygnathodus	hamadai	924.658	2.96598
50.96	Eurygnathodus	hamadai	1143.84	3.05836
50.96	Eurygnathodus	hamadai	554.795	2.74413
50.96	Eurygnathodus	hamadai	506.849	2.70488
50.96	Eurygnathodus	hamadai	678.082	2.83128
52.23	Neospathodus	cristagalli	663.291	2.8217
52.23	Novispathodus	waageni eowaageni	245.57	2.39017
52.23	Neospathodus	waageni waageni	348.485	2.54218
52.23	Neospathodus	cristagalli	587.5	2.76901
52.23	Neospathodus	waageni waageni	565.823	2.75268
52.23	Neospathodus	cristagalli	527.848	2.72251
52.23	Neospathodus	cristagalli	693.671	2.84115
52.23	Neospathodus	cristagalli	418.182	2.62137
52.23	Neospathodus	cristagalli	472.603	2.6745
52.23	Neospathodus	cristagalli	486.076	2.6867
52.23	Novispathodus	waageni waageni	351.515	2.54594
52.53	Neospathodus	pakistanensis	698.63	2.84425
52.53	Neospathodus	cristagalli	561.644	2.74946
52.53	Novispathodus	waageni waageni	479.452	2.68075
52.53	Novispathodus	waageni waageni	452.055	2.65519
52.53	Novispathodus	waageni waageni	452.055	2.65519
52.53	Neospathodus	cristagalli	383.562	2.58384
52.53	Novispathodus	waageni eowaageni	239.726	2.37972
52.53	Neospathodus	cristagalli	369.863	2.56804
52.53	Neospathodus	cristagalli	369.863	2.56804
52.53	Neospathodus	cristagalli	568.493	2.75473
52.53	Neospathodus	sp.	397.26	2.59908
52.53	Novispathodus	waageni eowaageni	342.466	2.53462
52.53	Neospathodus	dieneri 3	369.863	2.56804
52.53	Neospathodus	pakistanensis	547.945	2.73874
52.53	Neospathodus	pakistanensis	520.548	2.71646
52.53	Neospathodus	cristagalli	383.562	2.58384
52.53	Neospathodus	pakistanensis	609.589	2.78504
52.53	Neospathodus	pakistanensis	602.74	2.78013
52.53	Neospathodus	dieneri 3	315.068	2.4984
52.53	Neospathodus	sp.	541.096	2.73327
52.53	Neospathodus	cristagalli	438.356	2.64183
52.53	Novispathodus	waageni waageni	506.849	2.70488
52.53	Neospathodus	cristagalli	315.068	2.4984
52.53	Neospathodus	dieneri 3	534.247	2.72774
52.93	Neospathodus	cristagalli	315.068	2.4984
52.93	Novispathodus	cristagalli	280.822	2.44843
52.93	Neospathodus	dieneri 3	205.479	2.31277
52.93	Neospathodus	sp.	356.164	2.55165
52.93	Novispathodus	waageni eowaageni	226.027	2.35416
52.93	Neospathodus	dieneri 2	301.37	2.4791
52.93	Novispathodus	waageni eowaageni	267.123	2.42671
52.93	Neospathodus	sp.	219.178	2.3408
52.93	Neospathodus	cristagalli	308.219	2.48886
52.93	Neospathodus	cristagalli	356.164	2.55165
52.93	Neospathodus	sp.	226.027	2.35416
52.93	Neospathodus	cristagalli	178.082	2.25062
52.93	Discretella	discreta	808.219	2.90753
52.93	Neospathodus	cristagalli	493.151	2.69298
52.93	Novispathodus	waageni eowaageni	260.274	2.41543
52.93	Neospathodus	cristagalli	178.082	2.25062
52.93	Neospathodus	cristagalli	260.274	2.41543
52.93	Neospathodus	dieneri 1	239.726	2.37972
52.93	Novispathodus	waageni eowaageni	239.726	2.37972
52.93	Neospathodus	cristagalli	212.329	2.32701
52.93	Neospathodus	cristagalli	554.795	2.74413
52.93	Novispathodus	waageni eowaageni	198.63	2.29805
52.93	Novispathodus	waageni eowaageni	267.123	2.42671
52.93	Neospathodus	sp.	260.274	2.41543
52.93	Novispathodus	waageni eowaageni	198.63	2.29805
52.93	Novispathodus	waageni eowaageni	301.37	2.4791
52.93	Neospathodus	dieneri 3	212.329	2.32701
52.93	Novispathodus	waageni eowaageni	369.863	2.56804
52.93	Neospathodus	cristagalli	356.164	2.55165
52.93	Neospathodus	sp.	280.822	2.44843
52.93	Neospathodus	sp.	232.877	2.36713
52.93	Neospathodus	cristagalli	150.685	2.17807
52.93	Novispathodus	waageni eowaageni	226.027	2.35416
52.93	Neospathodus	dieneri 3	246.575	2.39195
52.93	Novispathodus	waageni eowaageni	253.425	2.40385
52.93	Novispathodus	waageni eowaageni	308.219	2.48886
52.93	Novispathodus	waageni eowaageni	301.37	2.4791
52.93	Neospathodus	cristagalli	328.767	2.51689
52.93	Novispathodus	waageni eowaageni	294.521	2.46912
52.93	Novispathodus	waageni eowaageni	171.233	2.23359
52.93	Novispathodus	waageni eowaageni	150.685	2.17807
52.93	Novispathodus	waageni eowaageni	315.068	2.4984
52.93	Novispathodus	waageni eowaageni	349.315	2.54322
52.93	Neospathodus	dieneri 3	253.425	2.40385
52.93	Neospathodus	dieneri 3	226.027	2.35416
52.93	Neospathodus	cristagalli	232.877	2.36713
52.93	Neospathodus	cristagalli	383.562	2.58384
52.93	Novispathodus	waageni eowaageni	157.534	2.19737
52.93	Novispathodus	waageni eowaageni	171.233	2.23359
52.93	Neospathodus	cristagalli	445.205	2.64856
52.93	Novispathodus	waageni eowaageni	232.877	2.36713
52.93	Neospathodus	cristagalli	246.575	2.39195
52.93	Novispathodus	waageni eowaageni	273.973	2.43771
52.93	Neospathodus	cristagalli	328.767	2.51689
52.93	Neospathodus	cristagalli	321.918	2.50775
52.93	Neospathodus	cristagalli	226.027	2.35416
52.93	Neospathodus	cristagalli	253.425	2.40385
52.93	Novispathodus	waageni eowaageni	205.479	2.31277
52.93	Novispathodus	waageni eowaageni	232.877	2.36713
52.93	Novispathodus	waageni eowaageni	253.425	2.40385
52.93	Novispathodus	waageni eowaageni	178.082	2.25062
52.93	Novispathodus	waageni eowaageni	294.521	2.46912
52.93	Novispathodus	waageni eowaageni	246.575	2.39195
52.93	Novispathodus	waageni eowaageni	253.425	2.40385
52.93	Novispathodus	waageni eowaageni	328.767	2.51689
52.93	Novispathodus	waageni eowaageni	191.781	2.28281
52.93	Novispathodus	waageni eowaageni	239.726	2.37972
52.93	Novispathodus	waageni eowaageni	315.068	2.4984
52.93	Neospathodus	cristagalli	417.808	2.62098
52.93	Novispathodus	waageni eowaageni	280.822	2.44843
52.93	Novispathodus	waageni eowaageni	219.178	2.3408
52.93	Novispathodus	waageni eowaageni	335.616	2.52584
52.93	Neospathodus	cristagalli	335.616	2.52584
52.93	Neospathodus	cristagalli	506.849	2.70488
52.93	Novispathodus	waageni waageni	164.384	2.21586
52.93	Neospathodus	cristagalli	431.507	2.63499
52.93	Novispathodus	waageni waageni	287.671	2.4589
52.93	Novispathodus	waageni waageni	184.932	2.26701
52.93	Novispathodus	waageni eowaageni	376.712	2.57601
52.93	Novispathodus	waageni eowaageni	253.425	2.40385
52.93	Novispathodus	waageni eowaageni	273.973	2.43771
52.93	Novispathodus	waageni waageni	260.274	2.41543
52.93	Novispathodus	waageni waageni	184.932	2.26701
52.93	Novispathodus	waageni waageni	157.534	2.19737
52.93	Neospathodus	cristagalli	424.658	2.62804
52.93	Novispathodus	waageni eowaageni	301.37	2.4791
52.93	Neospathodus	cristagalli	226.027	2.35416
52.93	Neospathodus	cristagalli	431.507	2.63499
52.93	Novispathodus	waageni waageni	253.425	2.40385
52.93	Neospathodus	cristagalli	260.274	2.41543
52.93	Novispathodus	waageni waageni	328.767	2.51689
52.93	Neospathodus	dieneri 1	342.466	2.53462
52.93	Neospathodus	dieneri 1	232.877	2.36713
52.93	Novispathodus	waageni waageni	198.63	2.29805
52.93	Novispathodus	waageni eowaageni	273.973	2.43771
52.93	Neospathodus	dieneri 2	191.781	2.28281
52.93	Novispathodus	waageni waageni	349.315	2.54322
52.93	Novispathodus	waageni waageni	219.178	2.3408
52.93	Neospathodus	cristagalli	493.151	2.69298
52.93	Novispathodus	waageni waageni	369.863	2.56804
52.93	Novispathodus	waageni waageni	246.575	2.39195
52.93	Novispathodus	waageni waageni	239.726	2.37972
52.93	Novispathodus	waageni waageni	301.37	2.4791
52.93	Neospathodus	cristagalli	500	2.69897
52.93	Neospathodus	cristagalli	458.904	2.66172
52.93	Neospathodus	cristagalli	404.11	2.6065
52.93	Neospathodus	cristagalli	397.26	2.59908
52.93	Neospathodus	cristagalli	500	2.69897
52.93	Neospathodus	cristagalli	232.877	2.36713
52.93	Neospathodus	sp.	253.425	2.40385
52.93	Novispathodus	waageni eowaageni	219.178	2.3408
52.93	Novispathodus	waageni waageni	328.767	2.51689
52.93	Novispathodus	waageni waageni	191.781	2.28281
52.93	Novispathodus	waageni waageni	445.205	2.64856
52.93	Neospathodus	waageni eowaageni	239.726	2.37972
52.93	Novispathodus	waageni waageni	321.918	2.50775
52.93	Novispathodus	waageni eowaageni	205.479	2.31277
52.93	Novispathodus	waageni eowaageni	315.068	2.4984
52.93	Novispathodus	waageni eowaageni	280.822	2.44843
52.93	Novispathodus	waageni eowaageni	280.822	2.44843
52.93	Novispathodus	waageni eowaageni	205.479	2.31277
52.93	Novispathodus	waageni eowaageni	273.973	2.43771
52.93	Novispathodus	waageni eowaageni	219.178	2.3408
52.93	Novispathodus	waageni waageni	280.822	2.44843
52.93	Neospathodus	cristagalli	472.603	2.6745
52.93	Novispathodus	waageni eowaageni	280.822	2.44843
52.93	Neospathodus	cristagalli	315.068	2.4984
52.93	Neospathodus	cristagalli	589.041	2.77015
52.93	Novispathodus	waageni eowaageni	253.425	2.40385
52.93	Neospathodus	cristagalli	486.301	2.68691
52.93	Neospathodus	cristagalli	547.945	2.73874
52.93	Discretella	discreta	650.685	2.81337
52.93	Novispthodus	waageni waageni	479.452	2.68075
52.93	Discretella	discreta	260.274	2.41543
52.93	Novispthodus	waageni waageni	321.918	2.50775
52.93	Neospathodus	sp.	219.178	2.3408
52.93	Novispthodus	waageni eowaageni	301.37	2.4791
52.93	Neospathodus	cristagalli	308.219	2.48886
52.93	Neospathodus	cristagalli	294.521	2.46912
52.93	Neospathodus	cristagalli	438.356	2.64183
52.93	Neospathodus	sp.	205.479	2.31277
52.93	Neospathodus	sp.	178.082	2.25062
52.93	Neospathodus	cristagalli	226.027	2.35416
52.93	Novispthodus	waageni eowaageni	205.479	2.31277
52.93	Novispthodus	waageni eowaageni	280.822	2.44843
52.93	Novispthodus	waageni eowaageni	383.562	2.58384
52.93	Novispthodus	waageni eowaageni	253.425	2.40385
52.93	Neospathodus	cristagalli	321.918	2.50775
52.93	Discretella	discreta	335.616	2.52584
52.93	Neospathodus	cristagalli	493.151	2.69298
52.93	Neospathodus	sp.	157.534	2.19737
52.93	Neospathodus	sp.	273.973	2.43771
52.93	Neospathodus	sp.	301.37	2.4791
52.93	Neospathodus	dieneri 3	260.274	2.41543
52.93	Neospathodus	sp.	191.781	2.28281
52.93	Neospathodus	dieneri 3	321.918	2.50775
52.93	Neospathodus	cristagalli	397.26	2.59908
52.93	Novispathodus	waageni waageni	328.767	2.51689
52.93	Neospathodus	sp.	226.027	2.35416
52.93	Neospathodus	cristagalli	575.342	2.75993
52.93	Novispathodus	waageni eowaageni	349.315	2.54322
52.93	Neospathodus	dieneri 1	260.274	2.41543
52.93	Novispathodus	waageni eowaageni	198.63	2.29805
52.93	Neospathodus	cristagalli	383.562	2.58384
52.93	Neospathodus	sp.	205.479	2.31277
52.93	Neospathodus	cristagalli	315.068	2.4984
52.93	Novispathodus	waageni eowaageni	369.863	2.56804
52.93	Novispathodus	waageni eowaageni	136.986	2.13668
52.93	Neospathodus	cristagalli	253.425	2.40385
52.93	Novispathodus	waageni eowaageni	280.822	2.44843
52.93	Novispathodus	waageni eowaageni	246.575	2.39195
52.93	Novispathodus	waageni eowaageni	575.342	2.75993
52.93	Novispathodus	waageni eowaageni	328.767	2.51689
52.93	Neospathodus	cristagalli	287.671	2.4589
52.93	Neospathodus	cristagalli	212.329	2.32701
52.93	Novispathodus	waageni eowaageni	280.822	2.44843
52.93	Novispathodus	waageni eowaageni	308.219	2.48886
52.93	Novispathodus	waageni eowaageni	253.425	2.40385
52.93	Neospathodus	cristagalli	267.123	2.42671
52.93	Novispathodus	waageni eowaageni	191.781	2.28281
52.93	Novispathodus	waageni eowaageni	246.575	2.39195
52.93	Neospathodus	cristagalli	287.671	2.4589
52.93	Neospathodus	cristagalli	164.384	2.21586
52.93	Neospathodus	cristagalli	198.63	2.29805
52.93	Neospathodus	cristagalli	164.384	2.21586
52.93	Neospathodus	cristagalli	280.822	2.44843
52.93	Novispathodus	waageni eowaageni	287.671	2.4589
52.93	Neospathodus	cristagalli	239.726	2.37972
52.93	Neospathodus	cristagalli	287.671	2.4589
52.93	Novispathodus	waageni waageni	383.562	2.58384
52.93	Neospathodus	cristagalli	554.795	2.74413
52.93	Neospathodus	dieneri 1	349.315	2.54322
52.93	Novispathodus	waageni eowaageni	232.877	2.36713
52.93	Neospathodus	cristagalli	260.274	2.41543
52.93	Novispathodus	waageni eowaageni	232.877	2.36713
52.93	Novispathodus	waageni eowaageni	212.329	2.32701
52.93	Novispathodus	waageni eowaageni	267.123	2.42671
52.93	Neospathodus	cristagalli	294.521	2.46912
52.93	Novispathodus	waageni eowaageni	260.274	2.41543
52.93	Novispathodus	waageni eowaageni	226.027	2.35416
52.93	Novispathodus	waageni eowaageni	335.616	2.52584
52.93	Novispathodus	waageni eowaageni	164.384	2.21586
52.93	Novispathodus	waageni eowaageni	267.123	2.42671
52.93	Novispathodus	waageni eowaageni	246.575	2.39195
52.93	Neospathodus	cristagalli	198.63	2.29805
52.93	Neospathodus	cristagalli	294.521	2.46912
52.93	Novispathodus	waageni eowaageni	328.767	2.51689
52.93	Neospathodus	cristagalli	472.603	2.6745
52.93	Novispathodus	waageni eowaageni	260.274	2.41543
52.93	Novispathodus	waageni eowaageni	205.479	2.31277
52.93	Novispathodus	waageni eowaageni	219.178	2.3408
52.93	Novispathodus	waageni eowaageni	315.068	2.4984
52.93	Novispathodus	waageni eowaageni	260.274	2.41543
52.93	Novispathodus	waageni eowaageni	315.068	2.4984
52.93	Novispathodus	waageni eowaageni	246.575	2.39195
52.93	Novispathodus	waageni eowaageni	205.479	2.31277
52.93	Neospathodus	cristagalli	417.808	2.62098
52.93	Novispathodus	waageni eowaageni	315.068	2.4984
52.93	Novispathodus	waageni eowaageni	260.274	2.41543
52.93	Novispathodus	waageni eowaageni	178.082	2.25062
52.93	Novispathodus	waageni eowaageni	287.671	2.4589
52.93	Neospathodus	cristagalli	267.123	2.42671
52.93	Neospathodus	cristagalli	232.877	2.36713
52.93	Neospathodus	sp.	171.233	2.23359
52.93	Neospathodus	cristagalli	575.342	2.75993
52.93	Novispathodus	waageni eowaageni	308.219	2.48886
52.93	Novispathodus	waageni eowaageni	239.726	2.37972
52.93	Neospathodus	cristagalli	239.726	2.37972
52.93	Neospathodus	cristagalli	452.055	2.65519
52.93	Neospathodus	cristagalli	287.671	2.4589
52.93	Neospathodus	cristagalli	198.63	2.29805
52.93	Neospathodus	cristagalli	253.425	2.40385
52.93	Novispathodus	waageni eowaageni	308.219	2.48886
52.93	Neospathodus	cristagalli	273.973	2.43771
52.93	Neospathodus	cristagalli	342.466	2.53462
52.93	Neospathodus	cristagalli	328.767	2.51689
52.93	Novispathodus	waageni eowaageni	335.616	2.52584
52.93	Neospathodus	cristagalli	287.671	2.4589
52.93	Neospathodus	cristagalli	376.712	2.57601
52.93	Novispathodus	waageni eowaageni	321.918	2.50775
52.93	Neospathodus	cristagalli	465.753	2.66816
52.93	Neospathodus	cristagalli	315.068	2.4984
52.93	Novispathodus	waageni eowaageni	260.274	2.41543
52.93	Neospathodus	cristagalli	472.603	2.6745
52.93	Novispathodus	waageni eowaageni	184.932	2.26701
52.93	Neospathodus	cristagalli	431.507	2.63499
52.93	Novispathodus	waageni eowaageni	260.274	2.41543
52.93	Novispathodus	waageni eowaageni	267.123	2.42671
52.93	Novispathodus	waageni eowaageni	294.521	2.46912
52.93	Novispathodus	waageni eowaageni	191.781	2.28281
52.93	Novispathodus	waageni eowaageni	219.178	2.3408
52.93	Novispathodus	waageni eowaageni	294.521	2.46912
52.93	Discretella	discreta	931.507	2.96919
52.93	Novispathodus	waageni eowaageni	383.562	2.58384
52.93	Novispathodus	waageni eowaageni	363.014	2.55992
52.93	Novispathodus	waageni eowaageni	239.726	2.37972
52.93	Neospathodus	cristagalli	404.11	2.6065
52.93	Novispathodus	waageni eowaageni	273.973	2.43771
52.93	Neospathodus	cristagalli	582.192	2.76507
52.93	Novispathodus	waageni eowaageni	417.808	2.62098
52.93	Novispathodus	waageni waageni	397.26	2.59908
52.93	Neospathodus	cristagalli	226.027	2.35416
52.93	Novispathodus	waageni waageni	390.411	2.59152
52.93	Neospathodus	cristagalli	219.178	2.3408
52.93	Neospathodus	cristagalli	602.74	2.78013
52.93	Novispathodus	waageni waageni	315.068	2.4984
52.93	Novispathodus	waageni waageni	356.164	2.55165
52.93	Neospathodus	cristagalli	431.507	2.63499
52.93	Novispathodus	waageni waageni	321.918	2.50775
52.93	Neospathodus	cristagalli	493.151	2.69298
52.93	Neospathodus	cristagalli	404.11	2.6065
52.93	Neospathodus	cristagalli	280.822	2.44843
52.93	Neospathodus	cristagalli	239.726	2.37972
52.93	Neospathodus	sp.	239.726	2.37972
52.93	Neospathodus	sp.	198.63	2.29805
52.93	Neospathodus	sp.	219.178	2.3408
52.93	Novispathodus	waageni eowaageni	260.274	2.41543
52.93	Novispathodus	waageni eowaageni	219.178	2.3408
52.93	Neospathodus	cristagalli	260.274	2.41543
52.93	Novispathodus	waageni eowaageni	328.767	2.51689
52.93	Neospathodus	cristagalli	287.671	2.4589
52.93	Neospathodus	cristagalli	328.767	2.51689
52.93	Neospathodus	cristagalli	493.151	2.69298
52.93	Neospathodus	cristagalli	260.274	2.41543
52.93	Novispathodus	waageni eowaageni	315.068	2.4984
52.93	Novispathodus	waageni eowaageni	219.178	2.3408
52.93	Neospathodus	cristagalli	308.219	2.48886
52.93	Novispathodus	waageni eowaageni	280.822	2.44843
52.93	Novispathodus	waageni eowaageni	363.014	2.55992
52.93	Novispathodus	waageni eowaageni	260.274	2.41543
52.93	Novispathodus	waageni eowaageni	342.466	2.53462
52.93	Novispathodus	waageni eowaageni	321.918	2.50775
52.93	Neospathodus	cristagalli	294.521	2.46912
52.93	Neospathodus	cristagalli	315.068	2.4984
52.93	Neospathodus	cristagalli	534.247	2.72774
52.93	Novispathodus	waageni eowaageni	349.315	2.54322
52.93	Novispathodus	waageni eowaageni	342.466	2.53462
52.93	Neospathodus	sp.	205.479	2.31277
52.93	Neospathodus	sp.	267.123	2.42671
52.93	Neospathodus	cristagalli	321.918	2.50775
52.93	Novispathodus	waageni eowaageni	315.068	2.4984
52.93	Neospathodus	cristagalli	246.575	2.39195
52.93	Neospathodus	cristagalli	363.014	2.55992
52.93	Novispathodus	waageni eowaageni	404.11	2.6065
52.93	Neospathodus	cristagalli	383.562	2.58384
52.93	Neospathodus	cristagalli	397.26	2.59908
52.93	Neospathodus	cristagalli	232.877	2.36713
52.93	Neospathodus	cristagalli	280.822	2.44843
52.93	Novispathodus	waageni eowaageni	335.616	2.52584
52.93	Novispathodus	waageni eowaageni	335.616	2.52584
52.93	Novispathodus	waageni waageni	465.753	2.66816
52.93	Novispathodus	waageni eowaageni	239.726	2.37972
52.93	Neospathodus	cristagalli	239.726	2.37972
52.93	Novispathodus	waageni eowaageni	287.671	2.4589
52.93	Neospathodus	cristagalli	212.329	2.32701
52.93	Neospathodus	cristagalli	287.671	2.4589
52.93	Neospathodus	cristagalli	226.027	2.35416
52.93	Neospathodus	cristagalli	246.575	2.39195
52.93	Neospathodus	cristagalli	267.123	2.42671
52.93	Novispathodus	waageni eowaageni	294.521	2.46912
52.93	Novispathodus	waageni eowaageni	328.767	2.51689
52.93	Novispathodus	waageni eowaageni	273.973	2.43771
52.93	Novispathodus	waageni eowaageni	253.425	2.40385
52.93	Novispathodus	waageni eowaageni	349.315	2.54322
52.93	Novispathodus	waageni eowaageni	315.068	2.4984
52.93	Neospathodus	cristagalli	342.466	2.53462
52.93	Novispathodus	waageni eowaageni	191.781	2.28281
52.93	Novispathodus	waageni eowaageni	171.233	2.23359
52.93	Novispathodus	waageni eowaageni	267.123	2.42671
52.93	Neospathodus	cristagalli	315.068	2.4984
52.93	Neospathodus	cristagalli	363.014	2.55992
52.93	Novispathodus	waageni eowaageni	267.123	2.42671
52.93	Neospathodus	cristagalli	383.562	2.58384
52.93	Neospathodus	cristagalli	657.534	2.81792
52.93	Novispathodus	waageni eowaageni	445.205	2.64856
52.93	Neospathodus	cristagalli	260.274	2.41543
52.93	Discretella	diacreta	965.753	2.98487
52.93	Neospathodus	cristagalli	938.356	2.97237
52.93	Neospathodus	dieneri 3	595.89	2.77517
52.93	Neospathodus	dieneri 1	253.425	2.40385
52.93	Neospathodus	cristagalli	315.068	2.4984
52.93	Neospathodus	cristagalli	328.767	2.51689
52.93	Novispathodus	waageni eowaageni	280.822	2.44843
54.13	Novispathodus	waageni eaowaageni	381.818	2.58186
54.13	Discretella	discreta	396.923	2.59871
54.13	Discretella	discreta	464.384	2.66688
54.13	Discretella	discreta	375.758	2.57491
54.13	Spathicuspus	sp.	320.548	2.50589
54.13	Neospathodus	cristagalli	407.595	2.61023
54.13	Neospathodus	cristagalli	478.481	2.67986
54.13	Discretella	discreta	487.805	2.68825
54.13	Spathicuspus	sp.	476.923	2.67845
54.13	Spathicuspus	sp.	526.027	2.72101
54.13	Spathicuspus	sp.	467.089	2.6694
54.13	Discretella	discreta	349.315	2.54322
54.13	Neospathodus	cristagalli	369.863	2.56804
54.13	Discretella	discreta	280.822	2.44843
54.13	Discretella	discreta	287.671	2.4589
54.63	Discretella	discreta	397.26	2.59908
54.63	Spathicuspus	sp.	465.753	2.66816
54.63	Parachirognathus	peciliaris	500	2.69897
54.63	Spathicuspus	sp.	589.041	2.77015
54.63	Spathicuspus	sp.	910.959	2.9595
54.63	Spathicuspus	sp.	260.274	2.41543
54.63	Discretella	discreta	369.863	2.56804
54.63	Spathicuspus	sp.	506.849	2.70488
54.63	Parachirognathus	peciliaris	609.589	2.78504
54.63	Spathicuspus	sp.	1253.42	3.0981
54.63	Spathicuspus	sp.	1253.42	3.0981
54.63	Spathicuspus	sp.	479.452	2.68075
54.63	Neospathodus	sp.	452.055	2.65519
54.63	Neospathodus	sp.	397.26	2.59908
56.93	Discretella	discreta	417.808	2.62098
56.93	Novispathodus	waageni waageni	328.767	2.51689
56.93	Novispathodus	waageni waageni	253.425	2.40385
56.93	Novispathodus	waageni waageni	335.616	2.52584
56.93	Neospathodus	cristgalli	513.699	2.71071
56.93	Novispathodus	waageni waageni	315.068	2.4984
56.93	Novispathodus	waageni waageni	321.918	2.50775
56.93	Novispathodus	waageni waageni	328.767	2.51689
56.93	Neospathodus	cristgalli	383.562	2.58384
56.93	Neospathodus	dieneri 1	369.863	2.56804
56.93	Neospathodus	cristgalli	500	2.69897
56.93	Neospathodus	sp.	369.863	2.56804
56.93	Novispathodus	waageni waageni	376.712	2.57601
56.93	Neospathodus	sp.	602.74	2.78013
56.93	Neospathodus	dieneri 1	404.11	2.6065
56.93	Novispathodus	waageni waageni	486.301	2.68691
56.93	Neospathodus	cristgalli	431.507	2.63499
56.93	Neospathodus	dieneri 3	308.219	2.48886
56.93	Neospathodus	sp.	719.178	2.85684
57.23	Cratognathodus	sp.	712.329	2.85268
57.23	Cratognathodus	sp.	616.438	2.78989
57.23	Cratognathodus	sp.	465.753	2.66816
57.23	Cratognathodus	sp.	404.11	2.6065
57.23	Discretella	discreta	349.315	2.54322
57.23	Discretella	discreta	705.479	2.84848
57.23	Discretella	discreta	369.863	2.56804
57.23	Discretella	discreta	232.877	2.36713
57.23	Discretella	discreta	431.507	2.63499
57.23	Discretella	discreta	780.822	2.89255
57.23	Discretella	discreta	246.575	2.39195
57.23	Discretella	discreta	458.904	2.66172
57.23	Discretella	discreta	349.315	2.54322
57.23	Discretella	discreta	273.973	2.43771
57.23	Discretella	discreta	458.904	2.66172
57.23	Discretella	discreta	534.247	2.72774
57.23	Discretella	discreta	547.945	2.73874
57.23	Discretella	discreta	308.219	2.48886
57.23	Discretella	discreta	321.918	2.50775
57.23	Discretella	discreta	253.425	2.40385
57.23	Discretella	discreta	232.877	2.36713
57.23	Discretella	discreta	397.26	2.59908
57.23	Discretella	discreta	308.219	2.48886
57.23	Discretella	discreta	438.356	2.64183
57.23	Discretella	discreta	287.671	2.4589
57.23	Discretella	discreta	280.822	2.44843
57.23	Discretella	discreta	301.37	2.4791
57.23	Discretella	discreta	212.329	2.32701
57.23	Discretella	discreta	294.521	2.46912
57.23	Discretella	discreta	369.863	2.56804
57.23	Discretella	discreta	527.397	2.72214
57.23	Discretella	discreta	356.164	2.55165
57.23	Discretella	discreta	335.616	2.52584
57.23	Discretella	discreta	417.808	2.62098
57.23	Discretella	discreta	294.521	2.46912
57.23	Discretella	discreta	280.822	2.44843
57.23	Discretella	discreta	232.877	2.36713
57.23	Discretella	discreta	404.11	2.6065
57.23	Discretella	discreta	328.767	2.51689
57.23	Discretella	discreta	465.753	2.66816
57.23	Discretella	discreta	328.767	2.51689
57.23	Discretella	discreta	383.562	2.58384
57.23	Discretella	discreta	397.26	2.59908
57.23	Discretella	discreta	301.37	2.4791
57.23	Discretella	discreta	294.521	2.46912
57.23	Discretella	discreta	287.671	2.4589
57.23	Discretella	discreta	267.123	2.42671
57.23	Discretella	discreta	493.151	2.69298
57.23	Discretella	discreta	465.753	2.66816
57.23	Discretella	discreta	582.192	2.76507
57.23	Discretella	discreta	465.753	2.66816
57.23	Discretetella	discreta	424.658	2.62804
57.23	Discretetella	discreta	328.767	2.51689
57.23	Discretetella	discreta	424.658	2.62804
57.23	Discretetella	discreta	404.11	2.6065
57.23	Discretetella	discreta	219.178	2.3408
57.23	Neospathodus	cristagali	671.233	2.82687
57.23	Neospathodus	cristagali	226.027	2.35416
57.23	Neospathodus	cristagali	246.575	2.39195
57.23	Neospathodus	cristagalli	294.521	2.46912
57.23	Neospathodus	cristagalli	465.753	2.66816
57.23	Neospathodus	cristagalli	294.521	2.46912
57.23	Neospathodus	cristagalli	363.014	2.55992
57.23	Neospathodus	cristagalli	369.863	2.56804
57.23	Neospathodus	cristagalli	383.562	2.58384
57.23	Neospathodus	cristagalli	253.425	2.40385
57.23	Neospathodus	cristagalli	417.808	2.62098
57.23	Neospathodus	cristagalli	431.507	2.63499
57.23	Neospathodus	cristagalli	301.37	2.4791
57.23	Neospathodus	cristagalli	273.973	2.43771
57.23	Neospathodus	cristagalli	438.356	2.64183
57.23	Neospathodus	cristagalli	315.068	2.4984
57.23	Neospathodus	cristagalli	602.74	2.78013
57.23	Neospathodus	cristagalli	363.014	2.55992
57.23	Neospathodus	cristagalli	321.918	2.50775
57.23	Neospathodus	cristagalli	321.918	2.50775
57.23	Neospathodus	cristagalli	198.63	2.29805
57.23	Neospathodus	cristagalli	363.014	2.55992
57.23	Neospathodus	cristagalli	232.877	2.36713
57.23	Neospathodus	cristagalli	397.26	2.59908
57.23	Neospathodus	cristagalli	363.014	2.55992
57.23	Neospathodus	cristagalli	280.822	2.44843
57.23	Neospathodus	cristagalli	390.411	2.59152
57.23	Neospathodus	cristagalli	212.329	2.32701
57.23	Neospathodus	cristagalli	287.671	2.4589
57.23	Neospathodus	cristagalli	397.26	2.59908
57.23	Neospathodus	cristagalli	232.877	2.36713
57.23	Neospathodus	cristagalli	219.178	2.3408
57.23	Neospathodus	cristagalli	383.562	2.58384
57.23	Neospathodus	cristagalli	445.205	2.64856
57.23	Neospathodus	cristagalli	232.877	2.36713
57.23	Neospathodus	cristagalli	438.356	2.64183
57.23	Neospathodus	cristagalli	376.712	2.57601
57.23	Neospathodus	cristagalli	356.164	2.55165
57.23	Neospathodus	cristagalli	308.219	2.48886
57.23	Neospathodus	cristagalli	431.507	2.63499
57.23	Neospathodus	cristagalli	260.274	2.41543
57.23	Neospathodus	cristagalli	273.973	2.43771
57.23	Neospathodus	cristagalli	315.068	2.4984
57.23	Neospathodus	cristagalli	198.63	2.29805
57.23	Neospathodus	cristagalli	349.315	2.54322
57.23	Neospathodus	cristagalli	198.63	2.29805
57.23	Neospathodus	cristagalli	219.178	2.3408
57.23	Neospathodus	cristagalli	246.575	2.39195
57.23	Neospathodus	cristagalli	232.877	2.36713
57.23	Neospathodus	cristagalli	294.521	2.46912
57.23	Neospathodus	cristagalli	253.425	2.40385
57.23	Neospathodus	cristagalli	315.068	2.4984
57.23	Neospathodus	cristagalli	294.521	2.46912
57.23	Neospathodus	cristagalli	253.425	2.40385
57.23	Neospathodus	cristagalli	308.219	2.48886
57.23	Neospathodus	cristagalli	239.726	2.37972
57.23	Neospathodus	cristagalli	267.123	2.42671
57.23	Neospathodus	cristagalli	260.274	2.41543
57.23	Neospathodus	cristagalli	630.137	2.79943
57.23	Neospathodus	cristagalli	205.479	2.31277
57.23	Neospathodus	cristagalli	404.11	2.6065
57.23	Neospathodus	cristagalli	479.452	2.68075
57.23	Neospathodus	cristagalli	472.603	2.6745
57.23	Neospathodus	cristagalli	280.822	2.44843
57.23	Neospathodus	cristagalli	363.014	2.55992
57.23	Neospathodus	cristagalli	465.753	2.66816
57.23	Neospathodus	cristagalli	458.904	2.66172
57.23	Neospathodus	cristagalli	219.178	2.3408
57.23	Neospathodus	cristagalli	212.329	2.32701
57.23	Neospathodus	cristagalli	493.151	2.69298
57.23	Neospathodus	cristagalli	253.425	2.40385
57.23	Neospathodus	cristagalli	219.178	2.3408
57.23	Neospathodus	cristagalli	246.575	2.39195
57.23	Neospathodus	cristagalli	287.671	2.4589
57.23	Neospathodus	cristagalli	308.219	2.48886
57.23	Neospathodus	cristagalli	458.904	2.66172
57.23	Neospathodus	cristagalli	438.356	2.64183
57.23	Neospathodus	cristagalli	458.904	2.66172
57.23	Neospathodus	cristagalli	993.151	2.99702
57.23	Neospathodus	cristagalli	506.849	2.70488
57.23	Neospathodus	cristagalli	404.11	2.6065
57.23	Neospathodus	cristagalli	239.726	2.37972
57.23	Neospathodus	cristagalli	232.877	2.36713
57.23	Neospathodus	dieneri 1	479.452	2.68075
57.23	Neospathodus	dieneri 1	198.63	2.29805
57.23	Neospathodus	dieneri 1	239.726	2.37972
57.23	Neospathodus	dieneri 1	705.479	2.84848
57.23	Neospathodus	dieneri 1	178.082	2.25062
57.23	Neospathodus	dieneri 2	232.877	2.36713
57.23	Neospathodus	dieneri 2	239.726	2.37972
57.23	Neospathodus	dieneri 2	219.178	2.3408
57.23	Neospathodus	dieneri 2	184.932	2.26701
57.23	Neospathodus	dieneri 2	294.521	2.46912
57.23	Neospathodus	dieneri 2	301.37	2.4791
57.23	Neospathodus	dieneri 2	342.466	2.53462
57.23	Neospathodus	dieneri 2	308.219	2.48886
57.23	Neospathodus	dieneri 2	287.671	2.4589
57.23	Neospathodus	dieneri 3	294.521	2.46912
57.23	Neospathodus	dieneri 3	431.507	2.63499
[truncated: 245 more rows]
